# Supplementary material for: In situ mechanochemical synthesis of nitrones followed by 1,3-dipolar cycloaddition: a catalyst-free, “green” route to cis-fused chromano[4,3-c]isoxazoles
Source: Royal Society of Chemistry journal article supplement (doi:10.1039/c5ra21044e), 2015-01-01

***In-situ* mechanochemical synthesis of nitrones followed by 1,3-dipolar cycloaddition: a catalyst-free, “green” route to *cis*-fused chromano[4,3-*c*]isoxazoles**

Zigme T. Bhutia,<sup>a</sup> Geethika P.,<sup>a</sup> Anurag Malik,<sup>a</sup> Vikash Kumar,<sup>a</sup> Amrita Chatterjee,<sup>\*a</sup> Biswajit Gopal Roy<sup>b</sup> and Mainak Banerjee<sup>\*a</sup>

<sup>a</sup>Department of Chemistry, Birla Institute of Technology and Science, Pilani- K. K. Birla, Goa Camps, Goa- 403 726, India.

<sup>b</sup>Department of Chemistry, Sikkim University, 6th Mile, Tadong, Gangtok, Sikkim-737102, India  
Email: [mainak@goa.bits-pilani.ac.in](mailto:mainak@goa.bits-pilani.ac.in) (M.B.); [amrita@goa.bits-pilani.ac.in](mailto:amrita@goa.bits-pilani.ac.in) (A.C.)

| Index                                                                                     | Page no. |
|-------------------------------------------------------------------------------------------|----------|
| General procedure for <i>O</i> -allylation of salicylaldehydes                            | 2        |
| Spectral data of chromeno[4,3- <i>c</i> ]isoxazoles ( <b>4</b> )                          | 2-8      |
| Studies to establish necessity of “Grinding”                                              | 8        |
| IR studies to determine the progress of the reaction                                      | 8-9      |
| Coupling constant values of ring junction protons of <b>4</b>                             | 10       |
| References                                                                                | 10       |
| Selected <sup>1</sup> H NMR and <sup>13</sup> C NMR of chromeno[4,3- <i>c</i> ]isoxazoles | 11-28    |

## General procedure for the *O*-allylation of salicylaldehyde derivatives<sup>1</sup>: synthesis of 2-(allyloxy)-5-methoxybenzaldehyde (**1e**).

In a round bottom flask equipped with a magnetic stirring bar was charged with 2-hydroxy-5-methoxybenzaldehyde (1.52 g, 10 mmol) and K<sub>2</sub>CO<sub>3</sub> (2.76 g, 20 mmol) in DMF (20 mL). To this stirring solution allyl bromide (1.04 mL, 12 mmol) was added dropwise. After stirring the solution for 2 days excess water was added and the crude product was extracted with EtOAc (3 x 10 mL). The combined organic phases was washed with brine, dried over Na<sub>2</sub>SO<sub>4</sub> and concentrated under vacuum. The residue was purified by column chromatography (5% EtOAc in petroleum ether) to afford **1e** (178 mg, 93%). <sup>1</sup>H NMR (400 MHz, CDCl<sub>3</sub>): δ (ppm) 3.81 (s, 3H), 4.61-4.63 (m, 2H), 5.33 (dd, *J*<sub>1</sub> = 1.5 Hz, *J*<sub>2</sub> = 10.8 Hz, 1H), 5.43 (dt, *J*<sub>1</sub> = 1.5 Hz, *J*<sub>2</sub> = 17.6 Hz, 1H), 6.02-6.10 (m, 1H), 6.94 (d, *J* = 9.2 Hz, 1H), 7.12 (dd, *J*<sub>1</sub> = 3.2 Hz, *J*<sub>2</sub> = 9.2 Hz, 1H), 7.33 (d, *J* = 3.2 Hz, 1H), 10.50 (s, 1H).

## Spectral data of chromano[4,3-*c*]isoxazoles

**3,3a,4,9b-Tetrahydro-1-phenyl-1*H*-chromeno[4,3-*c*]isoxazole (**4a**):** White solid, m.p.: 85-87

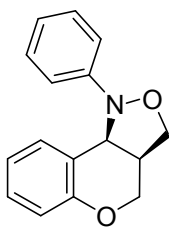

°C; <sup>1</sup>H NMR (300 MHz, CDCl<sub>3</sub>): δ (ppm) 2.99-3.09 (m, 1H), 4.03-4.14 (m, 2H), 4.23-4.35 (m, 2H), 4.87 (d, *J* = 7.8 Hz, 1H), 6.98 (d, *J* = 8.1 Hz, 1H), 7.04-7.14 (m, 2H), 7.25-7.29 (m, 3H), 7.38-7.43 (m, 2H), 7.51 (d, *J* = 10.0 Hz, 1H); <sup>13</sup>C NMR (75 MHz, CDCl<sub>3</sub>): δ (ppm) 40.8, 63.4, 65.3, 68.1, 115.5, 117.1, 121.9, 122.3, 122.8, 128.9, 129.2, 130.3, 151.0, 155.9; IR (KBr): 3031, 2873, 1587, 1487, 1303, 1125, 1088 cm<sup>-1</sup>; ESI-MS (*m/z*): 254 [M + H]; Anal. Calcd for C<sub>16</sub>H<sub>15</sub>NO<sub>2</sub>: C, 75.87; H, 5.97; N, 5.53. Found: C, 75.80; H, 5.91; N, 5.44.

**3,3a,4,9b-Tetrahydro-3,3-dimethyl-1-phenyl-1*H*-chromeno[4,3-*c*]isoxazole (**4b**):** Light

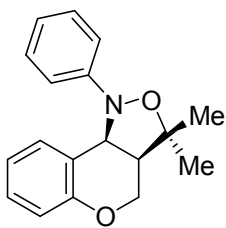

brown solid, m.p.: 72-75 °C; <sup>1</sup>H NMR (300 MHz, CDCl<sub>3</sub>): δ (ppm) 1.38 (s, 3H), 1.42 (s, 3H), 2.71-2.74 (m, 1H), 4.17 (t, *J* = 10.5 Hz, 1H), 4.36 (dd, *J*<sub>1</sub> = 4.8 Hz, *J*<sub>2</sub> = 10.8 Hz, 1H), 4.64 (d, *J* = 6.9 Hz, 1H), 6.86-7.01 (m, 3H), 7.10 (t, *J* = 7.2 Hz, 1H), 7.19-7.38 (m, 5H); <sup>13</sup>C NMR (75 MHz, CDCl<sub>3</sub>): δ (ppm) 22.1, 29.5, 48.5, 62.5, 64.6, 82.2, 116.8, 117.7, 121.07, 121.14, 123.3, 128.7, 129.0, 130.7, 151.4, 155.0; IR (KBr): 3036, 2975, 1590, 1488, 1224, 1121 cm<sup>-1</sup>; ESI-MS (*m/z*): 282 [M + H]<sup>+</sup>; Anal. Calcd

for C<sub>18</sub>H<sub>19</sub>NO<sub>2</sub>: C, 76.84; H, 6.81; N, 4.98. Found: C, 76.71; H, 6.86; N, 4.84.

**3,3a,4,9b-Tetrahydro-1-methyl-1*H*-chromeno[4,3-*c*]isoxazole (**4c**):** Light yellow viscous oil;

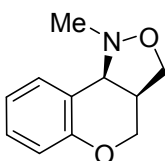

<sup>1</sup>H NMR (400 MHz, CDCl<sub>3</sub>): δ (ppm) 2.89 (s, 3H), 2.99-3.06 (m, 1H), 3.54 (d, *J* = 5.6 Hz, 1H), 3.72-3.75 (m, 1H), 4.08-4.20 (m, 2H), 4.29 (t, *J* = 8.2 Hz, 1H), 6.94 (d, *J* = 7.8 Hz, 1H), 7.00 (td, *J* = 1.2, 7.8 Hz, 1H), 7.23 (dd, *J*<sub>1</sub> = 1.6

Hz,  $J_2 = 7.6$  Hz, 1H), 7.25 (dd,  $J_1 = 1.6$  Hz,  $J_2 = 7.6$  Hz, 1H);  $^{13}\text{C}$  NMR (100 MHz,  $\text{CDCl}_3$ ):  $\delta$  (ppm) 40.2, 43.6, 64.7, 66.1, 67.4, 117.4, 119.6, 121.2, 129.5, 130.9, 155.7; IR (neat): 2966, 2869, 1584, 1490, 1247, 1219, 1053  $\text{cm}^{-1}$ ; ESI-MS ( $m/z$ ): 192 [ $\text{M} + \text{H}$ ] $^+$ ; Anal. Calcd for  $\text{C}_{11}\text{H}_{13}\text{NO}_2$ : C, 69.09; H, 6.85; N, 7.32. Found: C, 68.90; H, 6.96; N, 7.38.

**3,3a,4,9b-Tetrahydro-1,3,3-trimethyl-1H-chromeno[4,3-c]isoxazole (4d):** Yellow solid, m.p.:

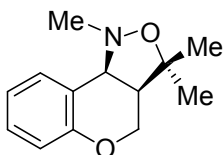

48-49  $^{\circ}\text{C}$ ;  $^1\text{H}$  NMR (300 MHz,  $\text{CDCl}_3$ ):  $\delta$  (ppm) 1.27 (s, 3H), 1.40 (s, 3H), 2.40-2.48 (m, 1H), 2.87 (s, 3H), 3.59 (d,  $J = 7.6$  Hz, 1H), 4.19-4.22 (m, 2H), 6.90-6.95 (m, 2H), 7.19-7.25 (m, 2H);  $^{13}\text{C}$  NMR (75 MHz,  $\text{CDCl}_3$ ):  $\delta$  (ppm) 22.7, 29.7, 43.8, 48.0, 61.6, 64.3, 79.1, 117.0, 118.9, 120.7, 129.4, 130.8, 155.2; IR (KBr): 2975, 2850, 1583, 1493, 1278, 1226, 1116  $\text{cm}^{-1}$ ; ESI-MS ( $m/z$ ): 220 [ $\text{M} + \text{H}$ ] $^+$ ; Anal. Calcd for  $\text{C}_{13}\text{H}_{17}\text{NO}_2$ : C, 71.21; H, 7.81; N, 6.39. Found: C, 71.30; H, 7.92; N, 6.38.

**8-Bromo-3,3a,4,9b-tetrahydro-1-phenyl-1H-chromeno[4,3-c]isoxazole (4e):** Pale yellow

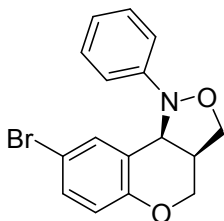

solid, m.p.: 110-113  $^{\circ}\text{C}$ ;  $^1\text{H}$  NMR (300 MHz,  $\text{CDCl}_3$ ):  $\delta$  (ppm) 3.02-3.08 (m, 1H), 4.05 (dd,  $J_1 = 5.4$  Hz,  $J_2 = 8.0$  Hz, 1H), 4.11 (dd,  $J_1 = 5.4$  Hz,  $J_2 = 12.3$  Hz, 1H), 4.22-4.34 (m, 2H), 4.83 (d,  $J = 7.5$  Hz, 1H), 6.80 (d,  $J = 8.7$  Hz, 1H), 7.08 (t,  $J = 7.5$  Hz, 1H), 7.21 (d,  $J = 7.6$  Hz, 2H), 7.29-7.39 (m, 4H);  $^{13}\text{C}$  NMR (75 MHz,  $\text{CDCl}_3$ ):  $\delta$  (ppm) 40.5, 63.0, 65.3, 68.0, 114.0, 115.2, 119.0, 123.0, 129.2, 130.9, 131.9, 132.7, 150.5, 155.0; IR (KBr): 2970, 2884, 1590, 1479, 1331, 1287, 1070  $\text{cm}^{-1}$ ; ESI-MS ( $m/z$ ): 332 [ $\text{M} + \text{H}$ ] $^+$  (for  $^{79}\text{Br}$ ), 334 [ $\text{M} + \text{H}$ ] $^+$  (for  $^{81}\text{Br}$ ); Anal. Calcd for  $\text{C}_{16}\text{H}_{14}\text{BrNO}_2$ : C, 57.85; H, 4.25; N, 4.22. Found: C, 57.70; H, 4.36; N, 4.31.

**8-Bromo-3,3a,4,9b-tetrahydro-3,3-dimethyl-1-phenyl-1H-chromeno[4,3-c]isoxazole (4f):**

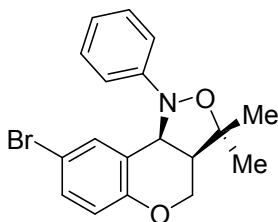

Yellow viscous oil;  $^1\text{H}$  NMR (300 MHz,  $\text{CDCl}_3$ ):  $\delta$  (ppm) 1.36 (s, 3H), 1.40 (s, 3H), 2.70-2.74 (m, 1H), 4.12 (dd,  $J_1 = 9.2$  Hz,  $J_2 = 11.2$  Hz, 1H), 4.34 (dd,  $J_1 = 4.8$  Hz,  $J_2 = 11.2$  Hz, 1H), 4.65 (d,  $J = 6.9$  Hz, 1H), 6.81 (d,  $J = 8.4$  Hz, 1H), 7.10 (t,  $J = 7.2$  Hz, 1H), 7.15 (d,  $J = 1.5$  Hz, 1H), 7.24-7.39 (m, 5H);  $^{13}\text{C}$  NMR (75 MHz,  $\text{CDCl}_3$ ):  $\delta$  (ppm) 22.2, 29.5, 48.2, 61.9, 64.6, 82.7, 113.2, 117.0, 118.7, 123.3, 123.6, 128.9, 131.9, 133.0, 151.2, 154.2; IR (neat): 3059, 2976, 1597, 1481, 1223, 1125, 1027  $\text{cm}^{-1}$ ; ESI-MS ( $m/z$ ): 360 [ $\text{M} + \text{H}$ ] $^+$  (for  $^{79}\text{Br}$ ), 362 [ $\text{M} + \text{H}$ ] $^+$  (for  $^{81}\text{Br}$ ); Anal. Calcd for  $\text{C}_{18}\text{H}_{18}\text{BrNO}_2$ : C, 60.01; H, 5.04; N, 3.89. Found: C, 60.20; H, 5.15; N, 3.88.

**8-Bromo-3,3a,4,9b-tetrahydro-1-methyl-1H-chromeno[4,3-c]isoxazole (4g):** White solid,

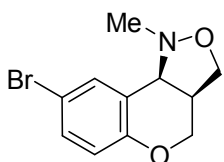

m.p.: 52-55  $^{\circ}\text{C}$ ;  $^1\text{H}$  NMR (400 MHz,  $\text{CDCl}_3$ ):  $\delta$  (ppm) 2.88 (s, 3H), 3.00-3.07 (m, 1H), 3.56 (d,  $J = 5.6$  Hz, 1H), 3.74 (dd,  $J_1 = 4.4$  Hz,  $J_2 = 8.0$  Hz,

1H), 4.08 (dd,  $J_1 = 8.0$  Hz,  $J_2 = 11.2$  Hz, 1H), 4.17 (dd,  $J_1 = 4.8$  Hz,  $J_2 = 11.2$  Hz, 1H), 4.29 (t,  $J = 8.0$  Hz, 1H), 6.82 (d,  $J = 8.8$  Hz, 1H), 7.33 (dd,  $J_1 = 2.4$  Hz,  $J_2 = 8.8$  Hz, 1H), 7.40 (d,  $J = 2.4$  Hz, 1H);  $^{13}\text{C}$  NMR (100 MHz,  $\text{CDCl}_3$ ):  $\delta$  (ppm) 40.0, 43.8, 64.3, 66.1, 67.3, 113.3, 119.2, 122.1, 132.4, 133.3, 154.8; IR (KBr): 2966, 2892, 1572, 1482, 1246, 1223, 1100  $\text{cm}^{-1}$ ; ESI-MS ( $m/z$ ): 270  $[\text{M} + 1]^+$  (for  $^{79}\text{Br}$ ), 272  $[\text{M} + \text{H}]^+$  (for  $^{81}\text{Br}$ ); Anal. Calcd for  $\text{C}_{11}\text{H}_{12}\text{BrNO}_2$ : C, 48.91; H, 4.48; N, 5.19. Found: C, 49.03; H, 4.55; N, 5.12.

**3,3a,4,9b-Tetrahydro-6-methoxy-1-phenyl-1H-chromeno[4,3-c]isoxazole (4j):** Yellow

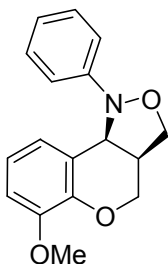

viscous oil;  $^1\text{H}$  NMR (400 MHz,  $\text{CDCl}_3$ ):  $\delta$  (ppm) 3.04-3.08 (m, 1H), 3.89 (s, 3H), 4.07 (dd,  $J_1 = 5.2$  Hz,  $J_2 = 8.0$  Hz, 1H), 4.17 (dd,  $J_1 = 5.2$  Hz,  $J_2 = 11.6$  Hz, 1H), 4.29-4.33 (m, 2H), 4.87 (d,  $J = 7.6$  Hz, 1H), 6.82 (dd,  $J_1 = 1.2$  Hz,  $J_2 = 8.0$  Hz, 1H), 6.96 (t,  $J = 7.8$  Hz, 1H), 7.02-7.09 (m, 2H), 7.19-7.26 (m, 2H), 7.32-7.36 (m, 2H);  $^{13}\text{C}$  NMR (100 MHz,  $\text{CDCl}_3$ ):  $\delta$  (ppm) 40.8, 56.1, 63.4, 65.8, 68.1, 110.6, 115.5, 121.5, 121.8, 122.9, 123.1, 129.3, 145.6, 148.4, 151.0; IR (neat): 3060, 2940, 1590, 1485, 1263, 1218, 1087  $\text{cm}^{-1}$ ; ESI-MS ( $m/z$ ): 284  $[\text{M} + \text{H}]^+$ ; Anal. Calcd for  $\text{C}_{17}\text{H}_{17}\text{NO}_3$ : C, 72.07; H, 6.05; N, 4.94.

Found: C, 72.01; H, 6.09; N, 5.02.

**3,3a,4,9b-Tetrahydro-6-methoxy-3,3-dimethyl-1-phenyl-1H-chromeno[4,3-c]isoxazole (4k):**

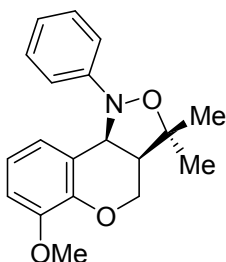

White Solid, m.p.: 148-151  $^\circ\text{C}$ ;  $^1\text{H}$  NMR (400 MHz,  $\text{CDCl}_3$ ):  $\delta$  (ppm) 1.32 (s, 3H), 1.43 (s, 3H), 2.70-2.76 (m, 1H), 3.90 (s, 3H), 4.21 (t,  $J = 10.2$  Hz, 1H), 4.46 (dd,  $J_1 = 4.8$  Hz,  $J_2 = 11.2$  Hz, 1H), 4.68 (d,  $J = 6.8$  Hz, 1H), 6.64 (dd,  $J_1 = 2.2$  Hz,  $J_2 = 6.8$  Hz, 1H), 6.81-6.86 (m, 2H), 7.08 (dt,  $J_1 = 1.0$  Hz,  $J_2 = 6.8$  Hz, 1H), 7.24-7.39 (m, 4H);  $^{13}\text{C}$  NMR (100 MHz,  $\text{CDCl}_3$ ):  $\delta$  (ppm) 22.2, 29.5, 48.5, 56.1, 62.3, 65.1, 82.6, 110.6, 117.5, 120.7, 122.2, 122.3, 123.2, 128.9, 144.7, 148.4, 151.6; IR (KBr): 3059, 2976, 1590, 1485, 1260, 1219, 1099  $\text{cm}^{-1}$ ; ESI-MS ( $m/z$ ): 334  $[\text{M} + 23]^+$ ; Anal. Calcd for  $\text{C}_{19}\text{H}_{21}\text{NO}_3$ : C, 73.29; H, 6.80; N, 4.50. Found: C, 73.40; H, 6.85; N, 4.63.

Found: C, 73.40; H, 6.85; N, 4.63.

**3,3a,4,9b-Tetrahydro-6-methoxy-1-methyl-1H-chromeno[4,3-c]isoxazole (4l):** Light yellow

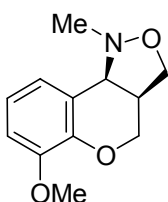

solid, m.p.: 52-53  $^\circ\text{C}$ ;  $^1\text{H}$  NMR (400 MHz,  $\text{CDCl}_3$ ):  $\delta$  (ppm) 2.84 (s, 3H), 2.94-3.00 (m, 1H), 3.51 (d,  $J = 3.6$  Hz, 1H), 3.70 (dd,  $J_1 = 3.3$  Hz,  $J_2 = 6.0$  Hz, 1H), 3.84 (s, 3H), 4.12 (t,  $J = 7.5$  Hz, 1H), 4.21-4.26 (m, 2H), 6.80-6.90 (m, 3H);  $^{13}\text{C}$  NMR (100 MHz,  $\text{CDCl}_3$ ):  $\delta$  (ppm) 40.0, 43.7, 56.0, 64.4, 66.3, 67.2, 111.0, 120.3, 120.7, 122.4, 145.1, 148.6; IR (neat): 3006, 2836, 1583,

1485, 1262, 1211, 1084  $\text{cm}^{-1}$ ; ESI-MS ( $m/z$ ): 244  $[\text{M} + 23]^+$ ; Anal. Calcd for  $\text{C}_{12}\text{H}_{15}\text{NO}_3$ : C, 65.14; H, 6.83; N, 6.33. Found: C, 65.40; H, 6.89; N, 6.47.

**8-Chloro-3,3a,4,9b-tetrahydro-3,3-dimethyl-1-phenyl-1H-chromeno[4,3-c]isoxazole (4n):**

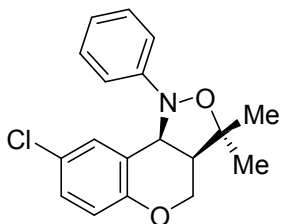

Light brown solid, m.p.: 57-58  $^{\circ}\text{C}$ ;  $^1\text{H}$  NMR (400 MHz,  $\text{CDCl}_3$ ):  $\delta$  (ppm) 1.36 (s, 3H), 1.41 (s, 3H), 2.70-2.75 (m, 1H), 4.13 (dd,  $J_1 = 9.2$  Hz,  $J_2 = 11.2$  Hz, 1H), 4.35 (dd,  $J_1 = 4.8$  Hz,  $J_2 = 11.2$  Hz, 1H), 4.66 (d,  $J = 7.2$  Hz, 1H), 6.87 (d,  $J = 8.4$  Hz, 1H), 7.04 (d,  $J = 2.4$  Hz, 1H), 7.11 (t,  $J = 7.0$  Hz, 1H), 7.17 (dd,  $J_1 = 2.8$  Hz,  $J_2 = 8.4$  Hz, 1H), 7.24-7.26 (m, 2H), 7.28-7.36 (m, 2H);  $^{13}\text{C}$  NMR (100 MHz,  $\text{CDCl}_3$ ):  $\delta$  (ppm) 22.3, 29.7, 48.4, 62.1, 64.9, 82.9, 117.0, 118.4, 123.3, 123.4, 126.1, 129.1, 129.2, 130.2, 151.4, 153.8; IR (KBr): 3059, 2972, 1596, 1483, 1259, 1146, 1011  $\text{cm}^{-1}$ ; ESI-MS ( $m/z$ ): 338  $[\text{M} + 23]^+$  (major peak, for  $^{35}\text{Cl}$ ), 340  $[\text{M} + 23]^+$  (minor peak, for  $^{37}\text{Cl}$ ); Anal. Calcd for  $\text{C}_{18}\text{H}_{18}\text{ClNO}_2$ : C, 68.46; H, 5.75; N, 4.44. Found: C, 68.34; H, 5.85; N, 4.54.

**3,3a,4,9b-tetrahydro-3,3,8-trimethyl-1-phenyl-1H-chromeno[4,3-c]isoxazole (4p):** Yellow

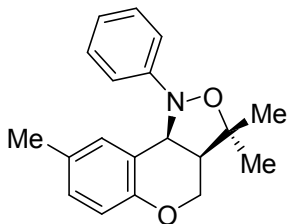

solid, m.p.: 54-56  $^{\circ}\text{C}$ ;  $^1\text{H}$  NMR (400 MHz,  $\text{CDCl}_3$ ):  $\delta$  (ppm) 1.36 (s, 3H), 1.42 (s, 3H), 2.23 (s, 3H), 2.71-2.76 (m, 1H), 4.12 (dd,  $J_1 = 9.2$  Hz,  $J_2 = 11.2$  Hz, 1H), 4.34 (dd,  $J_1 = 4.8$  Hz,  $J_2 = 11.2$  Hz, 1H), 4.69 (d,  $J = 7.2$  Hz, 1H), 6.83-6.88 (m, 2H), 7.02 (dd,  $J_1 = 1.6$  Hz,  $J_2 = 8.0$  Hz, 1H), 7.08-7.10 (m, 1H), 7.26-7.28 (m, 2H), 7.34-7.38 (m, 2H);  $^{13}\text{C}$  NMR (100 MHz,  $\text{CDCl}_3$ ):  $\delta$  (ppm) 20.8, 22.3, 29.7, 48.9, 62.4, 64.8, 82.9, 116.7, 117.0, 121.4, 123.0, 128.9, 129.8, 130.7, 130.8, 152.0, 153.0; ESI-MS ( $m/z$ ): 296  $[\text{M} + \text{H}]^+$ ; Anal. Calcd for  $\text{C}_{19}\text{H}_{21}\text{NO}_2$ : C, 77.26; H, 7.17; N, 4.74. Found: C, 77.17; H, 7.27; N, 4.68.

**8-Fluoro-3,3a,4,9b-tetrahydro-1-phenyl-1H-chromeno[4,3-c]isoxazole (4q):** Light gray solid,

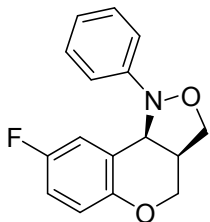

m.p.: 84-87  $^{\circ}\text{C}$ ;  $^1\text{H}$  NMR (400 MHz,  $\text{CDCl}_3$ ):  $\delta$  (ppm) 3.06-3.10 (m, 1H), 4.04-4.11 (m, 2H), 4.25 (dd,  $J_1 = 4.4$  Hz,  $J_2 = 11.6$  Hz, 1H), 4.34 (t,  $J = 8.2$  Hz, 1H), 4.84 (d,  $J = 8.0$  Hz, 1H), 6.87-7.00 (m, 2H), 7.09 (t,  $J = 7.4$  Hz, 1H), 7.12-7.22 (m, 3H), 7.36-7.40 (m, 2H);  $^{13}\text{C}$  NMR (100 MHz,  $\text{CDCl}_3$ ):  $\delta$  (ppm) 40.8, 63.5, 65.7, 68.2, 115.3, 116.0 (d,  $J = 10$  Hz), 116.2 (d,  $J = 10$  Hz), 118.4 (d,  $J = 8$  Hz), 123.1, 123.8 (d,  $J = 8$  Hz), 129.4, 150.8, 152.1, 157.7 (d,  $J = 239$  Hz); IR (KBr): 3063, 2878, 1597, 1489, 1247, 1208, 1087  $\text{cm}^{-1}$ ; ESI-MS ( $m/z$ ): 272  $[\text{M} + \text{H}]^+$ ; Anal. Calcd for  $\text{C}_{16}\text{H}_{14}\text{FNO}_2$ : C, 70.84; H, 5.20; N, 5.16. Found: C, 70.68; H, 5.25; N, 5.04.

**8-Fluoro-3,3a,4,9b-tetrahydro-3,3-dimethyl-1-phenyl-1H-chromeno[4,3-c]isoxazole (4r):**

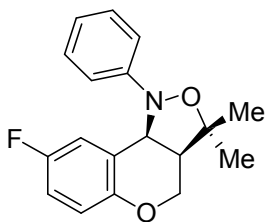

White solid, m.p.: 118-121 °C; <sup>1</sup>H NMR (400 MHz, CDCl<sub>3</sub>): δ (ppm) 1.36 (s, 3H), 1.42 (s, 3H), 2.71-2.77 (m, 1H), 4.10 (dd, *J*<sub>1</sub> = 9.6 Hz, *J*<sub>2</sub> = 11.2 Hz, 1H), 4.34 (dd, *J*<sub>1</sub> = 4.8 Hz, *J*<sub>2</sub> = 11.2 Hz, 1H), 4.67 (d, *J* = 7.2 Hz, 1H), 6.77 (dd, *J*<sub>1</sub> = 2.8 Hz, *J*<sub>2</sub> = 8.8 Hz, 1H), 6.87-6.95 (m, 2H), 7.08-7.12 (m, 1H), 7.24-7.39 (m, 4H); <sup>13</sup>C NMR (100 MHz, CDCl<sub>3</sub>): δ (ppm) 22.2, 29.6, 48.7, 62.3, 65.0, 82.9, 116.1 (d, *J* = 23 Hz), 116.4 (d, *J* = 23 Hz), 117.1, 118.1 (d, *J* = 8 Hz), 123.0 (d, *J* = 7 Hz), 123.4, 129.1, 151.3, 151.5, 157.3 (d, *J* = 237 Hz); IR (KBr): 3059, 2974, 1599, 1490, 1256, 1193, 1017 cm<sup>-1</sup>; ESI-MS (*m/z*): 300 [M + H]<sup>+</sup>; Anal. Calcd for C<sub>18</sub>H<sub>18</sub>FNO<sub>2</sub>: C, 72.22; H, 6.06; N, 4.68. Found: C, 72.17; H, 6.13; N, 4.62.

**8-Fluoro-3,3a,4,9b-tetrahydro-1-methyl-1H-chromeno[4,3-c]isoxazole (4s):** Yellow viscous

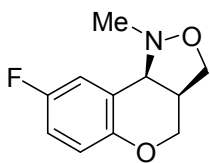

oil; <sup>1</sup>H NMR (400 MHz, CDCl<sub>3</sub>): δ (ppm) 2.85 (s, 3H), 3.01-3.03 (m, 1H), 3.54-3.56 (m, 1H), 3.74 (dd, *J*<sub>1</sub> = 4.4 Hz, *J*<sub>2</sub> = 8.4 Hz, 1H), 4.03- 4.15 (m, 2H), 4.27 (t, *J* = 8.0 Hz, 1H), 6.85 (dd, *J*<sub>1</sub> = 4.8 Hz, *J*<sub>2</sub> = 8.8 Hz, 1H), 6.91 (dd, *J*<sub>1</sub> = 2.8 Hz, *J*<sub>2</sub> = 8.4 Hz, 1H), 6.95-6.98 (m, 1H); <sup>13</sup>C NMR (100 MHz, CDCl<sub>3</sub>): δ (ppm) 40.1, 43.7, 64.5, 66.1, 67.2, 116.2 (d, *J* = 13 Hz), 116.4 (d, *J* = 13 Hz), 118.3, 121.1 (d, *J* = 7 Hz), 151.7, 157.0 (d, *J* = 238 Hz); IR (neat): 2961, 2871, 1495, 1436, 1243, 1205, 1048 cm<sup>-1</sup>; ESI-MS (*m/z*): 210 [M + H]<sup>+</sup>; Anal. Calcd for C<sub>11</sub>H<sub>12</sub>FNO<sub>2</sub>: C, 63.15; H, 5.78; N, 6.69. Found: C, 63.03; H, 5.86; N, 6.58.

**8-Nitro-1-phenyl-1,3a,4,9b-tetrahydro-3H-chromeno[4,3-c]isoxazole (4t):** Yellow solid, m.p.

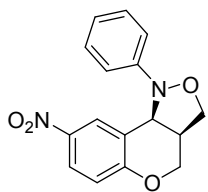

147-149 °C; <sup>1</sup>H NMR (CDCl<sub>3</sub>, 400 MHz): δ 3.09-3.14 (1H, m), 4.05 (dd, *J*<sub>1</sub> = 5.8 Hz, *J*<sub>2</sub> = 8.0, Hz, 1H), 4.29 (dd, *J*<sub>1</sub> = 4.8 Hz, *J*<sub>2</sub> = 11.6, Hz, 1H), 4.36 (dd, *J*<sub>1</sub> = 3.6 Hz, *J*<sub>2</sub> = 11.6, Hz, 1H), 4.39 (d, *J* = 8.4 Hz, 1H), 4.92 (d, *J* = 7.8 Hz, 1H), 7.00 (d, *J* = 9.0 Hz, 1H), 7.12 (d, *J* = 7.2 Hz, 1H), 7.22 (d, *J* = 7.8 Hz, 2H), 7.38 (dd, *J* = 7.8 Hz, 2H), 8.12 (dd, *J* = 2.4, 9.0 Hz, 1H), 8.42 (d, *J* = 2.4 Hz, 1H); <sup>13</sup>C NMR (CDCl<sub>3</sub>, 100 MHz): δ 39.6, 62.8, 65.5, 67.8, 115.4, 117.9, 122.7, 123.4, 124.8, 126.7, 129.4, 142.2, 149.9, 160.9. ESI-MS (*m/z*): 299 [M + H]<sup>+</sup>; Anal. Calcd for C<sub>16</sub>H<sub>14</sub>N<sub>2</sub>O<sub>4</sub>: C, 64.42; H, 4.73; N, 9.39. Found: C, 64.54; H, 4.59; N, 9.48.

**3,3a,4,9b-Tetrahydro-1-phenyl-1H-chromeno[4,3-c]isoxazole-8-carbonitrile (4u):** White

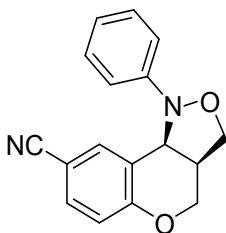

solid, m.p.: 158-160 °C; <sup>1</sup>H NMR (400 MHz, CDCl<sub>3</sub>): δ (ppm) 3.09-3.12 (m, 1H), 4.04 (dd, *J*<sub>1</sub> = 5.6 Hz, *J*<sub>2</sub> = 8.0 Hz, 1H), 4.23 (dd, *J*<sub>1</sub> = 4.8 Hz, *J*<sub>2</sub>

= 11.6 Hz, 1H), 4.32-4.39 (m, 2H), 4.85 (d,  $J = 7.6$  Hz, 1H), 6.98 (d,  $J = 8.4$  Hz, 1H), 7.09-7.13 (m, 1H), 7.18-7.21 (m, 2H), 7.36-7.40 (m, 2H), 7.49 (dd,  $J_1 = 2.0$  Hz,  $J_2 = 8.4$  Hz, 1H), 7.81 (d,  $J = 1.2$  Hz, 1H);  $^{13}\text{C}$  NMR (100 MHz,  $\text{CDCl}_3$ ):  $\delta$  (ppm) 40.1, 62.8, 65.6, 68.1, 105.4, 115.6, 118.5, 119.0, 123.56, 123.60, 129.5, 132.9, 135.2, 150.2, 159.4; IR (KBr): 3090, 2888, 2221, 1609, 1493, 1247, 1017  $\text{cm}^{-1}$ ; ESI-MS ( $m/z$ ): 279  $[\text{M} + \text{H}]^+$ ; Anal. Calcd for  $\text{C}_{17}\text{H}_{14}\text{N}_2\text{O}_2$ : C, 73.37; H, 5.07; N, 10.07. Found: C, 73.20; H, 5.18; N, 10.01.

**3,3a,4,9b-Tetrahydro-1-methyl-1H-chromeno[4,3-c]isoxazole-8-carbonitrile (4w):** White

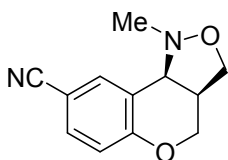

solid, m.p.: 114-116  $^{\circ}\text{C}$ ;  $^1\text{H}$  NMR (400 MHz,  $\text{CDCl}_3$ ):  $\delta$  (ppm) 2.86 (s, 3H), 3.00-3.07 (m, 1H), 3.62 (d,  $J = 5.2$  Hz, 1H), 3.73 (dd,  $J_1 = 4.4$  Hz,  $J_2 = 8.0$  Hz, 1H), 4.11-4.16 (m, 1H), 4.21 (dd,  $J_1 = 4.8$  Hz,  $J_2 = 11.2$  Hz, 1H), 4.28 (t,  $J = 8.0$  Hz, 1H), 6.92 (d,  $J = 8.8$  Hz, 1H), 7.62 (dd,  $J_1 = 2.0$  Hz,  $J_2 = 8.8$  Hz, 1H), 7.83 (d,  $J = 2.0$  Hz, 1H);  $^{13}\text{C}$  NMR (100 MHz,  $\text{CDCl}_3$ ):  $\delta$  (ppm) 39.8, 43.7, 64.2, 66.1, 67.2, 117.4, 120.0, 126.3, 128.5, 132.2, 158.7, 169.0; ESI-MS ( $m/z$ ): 217  $[\text{M} + \text{H}]^+$ ; Anal. Calcd for  $\text{C}_{12}\text{H}_{12}\text{N}_2\text{O}_2$ : C, 66.65; H, 5.59; N, 12.96. Found: C, 66.73; H, 5.68; N, 12.87.

**3,3a,4,9b-Tetrahydro-1-phenyl-1H-benzo[f]chromeno[4,3-c]isoxazole (4x):** Brown

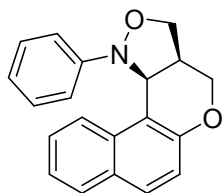

solid, m.p.: 156-158  $^{\circ}\text{C}$ ;  $^1\text{H}$  NMR (400 MHz,  $\text{CDCl}_3$ ):  $\delta$  (ppm) 3.02-3.08 (m, 1H), 4.16-4.30 (m, 3H), 4.38 (dd,  $J_1 = 7.6$  Hz,  $J_2 = 10.0$  Hz, 1H), 5.60 (d,  $J = 7.6$  Hz, 1H), 7.10-7.15 (m, 2H), 7.36-7.44 (m, 5H), 7.53 (dd,  $J_1 = 1.2$  Hz,  $J_2 = 6.8$  Hz, 1H), 7.76 (d,  $J = 8.8$  Hz, 1H), 7.82 (d,  $J = 8.2$  Hz, 1H), 8.14 (d,  $J = 8.2$  Hz, 1H);  $^{13}\text{C}$  NMR (100 MHz,  $\text{CDCl}_3$ ):  $\delta$  (ppm) 40.7, 60.1, 65.1, 68.1, 113.2, 115.1, 118.9, 122.8, 123.4, 123.9, 127.0, 128.8, 129.5, 130.1, 130.2, 133.0, 150.2, 155.3; IR (KBr): 3059, 2885, 1597, 1485, 1342, 1225, 1102  $\text{cm}^{-1}$ ; ESI-MS ( $m/z$ ): 304  $[\text{M} + \text{H}]^+$ ; Anal. Calcd for  $\text{C}_{20}\text{H}_{17}\text{NO}_2$ : C, 79.19; H, 5.65; N, 4.62. Found: C, 79.24; H, 5.68; N, 4.59.

**3,3a,4,9b-Tetrahydro-1-methyl-1H-benzo[f]chromeno[4,3-c]isoxazole (4z):** Yellow solid,

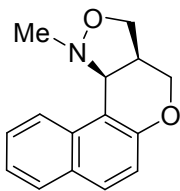

m.p.: 94-97  $^{\circ}\text{C}$ ;  $^1\text{H}$  NMR (400 MHz,  $\text{CDCl}_3$ ):  $\delta$  (ppm) 2.87 (s, 3H), 3.18-3.44 (m, 1H), 4.06-4.28 (m, 3H), 4.43 (t,  $J = 8.6$  Hz, 1H), 4.65 (d,  $J = 7.6$  Hz, 1H), 7.10 (d,  $J = 8.8$  Hz, 1H), 7.38 (t,  $J = 7.2$  Hz, 1H), 7.52-7.55 (m, 1H), 7.71 (d,  $J = 9.2$  Hz, 1H), 7.78 (d,  $J = 8.0$  Hz, 1H), 7.94-7.98 (m, 1H);  $^{13}\text{C}$  NMR (100 MHz,  $\text{CDCl}_3$ ):  $\delta$  (ppm) 40.8, 48.2, 64.4, 65.6, 68.0, 111.3, 118.9, 122.3, 123.2, 123.9, 126.9, 128.7, 130.0, 133.4, 151.3; IR (KBr): 3072, 2882, 1598, 1509,

1434, 1226, 1184, 1104  $\text{cm}^{-1}$ ; ESI-MS ( $m/z$ ): 242  $[\text{M} + \text{H}]^+$ ; Anal. Calcd for  $\text{C}_{15}\text{H}_{15}\text{NO}_2$ : C, 74.67; H, 6.27; N, 5.81. Found: C, 74.46; H, 6.22; N, 5.74.

### Studies to establish necessity of “Grinding”:

As a part of the study to establish the necessity of grinding for smooth formation of intermediate nitrone (**3**) reactions between 2-(allyloxy)benzaldehyde (**1a**) and phenylhydroxylamine (**2a**) were carried out in solution phase and under “neat-mixing” for 24 h and results are tabulated below (Table S2). In all the cases the reactions formed a mixture of nitrone (**3a**), product (**4a**) and unreacted starting materials in various proportions. Noticeably, neat-mixing gave better result in terms of product formation after 24 h (Table S2, entry 5). However, further progress of reaction was slowed down with time (Table S2, entry 6).

**Table S1.** Nitrone formation by conventional methods

| Sl. No. | Solvent <sup>a</sup>                | Time (h) | % nitrone ( <b>3a</b> ) <sup>b</sup> | % product ( <b>4a</b> ) <sup>c</sup> | % starting material recovered ( <b>1a</b> ) <sup>c</sup> |
|---------|-------------------------------------|----------|--------------------------------------|--------------------------------------|----------------------------------------------------------|
| 1       | $\text{CHCl}_3$                     | 24       | 44                                   | 16                                   | 40                                                       |
| 2       | EtOH                                | 24       | 54                                   | 12                                   | 34                                                       |
| 3       | EtOH- $\text{H}_2\text{O}$<br>(1:1) | 24       | 30                                   | 06                                   | 64                                                       |
| 4       | $\text{H}_2\text{O}$                | 24       | trace amount <sup>d</sup>            | nil                                  | --                                                       |
| 5       | Neat                                | 24       | 52                                   | 26                                   | 22                                                       |
| 6       | Neat                                | 48       | 42                                   | 43                                   | 15                                                       |

<sup>a</sup>Equimolar mixture of **1a** and **2a** (in 0.05 mmol scale) were stirred either in solution or under neat condition. <sup>b</sup>The percentage of nitrone remaining in reaction mixture was approximated by subtracting % of product formed and % of starting material left. As nitrone (**3a**) to chromano isoxazole (**4a**) formation was continuous process, no attempt was made to isolate **3a** in pure form. <sup>c</sup>Yields refer to the isolated product (and starting material). They were isolated by preparative TLC. <sup>d</sup>Not isolated.

### Infrared Spectroscopic studies:

Infrared spectroscopic studies were conducted to capture the progress of the reaction. The reaction between 2-(allyloxy)benzaldehyde and phenylhydroxylamine was monitored by taking IR spectra of the crude reaction mixture at different time interval. The study was conducted by grinding in an Agate mortar and by taking small portion of the reaction mixture for IR spectra at a given time. As shown in Fig. S1, the characteristic stretching bands of starting materials like



carbonyl of aromatic aldehyde at  $1682\text{ cm}^{-1}$  and phenylhydroxylamine O-H and N-H bands at  $3240\text{ cm}^{-1}$  and  $3118\text{ cm}^{-1}$ . This characteristic peak almost disappeared after grinding the reaction mixture for 5 min. In contrast, a new peak at  $1545\text{ cm}^{-1}$  was appeared in the IR spectrum which is supposed to be the C=N stretching band of intermediate nitrone. As the reaction progressed further (see IR spectra after 10 min) this peak significantly developed indicating the formation of intermediate nitrone. The IR spectrum of the crude reaction mixture after heating revealed the formation of chromenoisoxazole by intramolecular 1,3-dipolar cycloaddition.

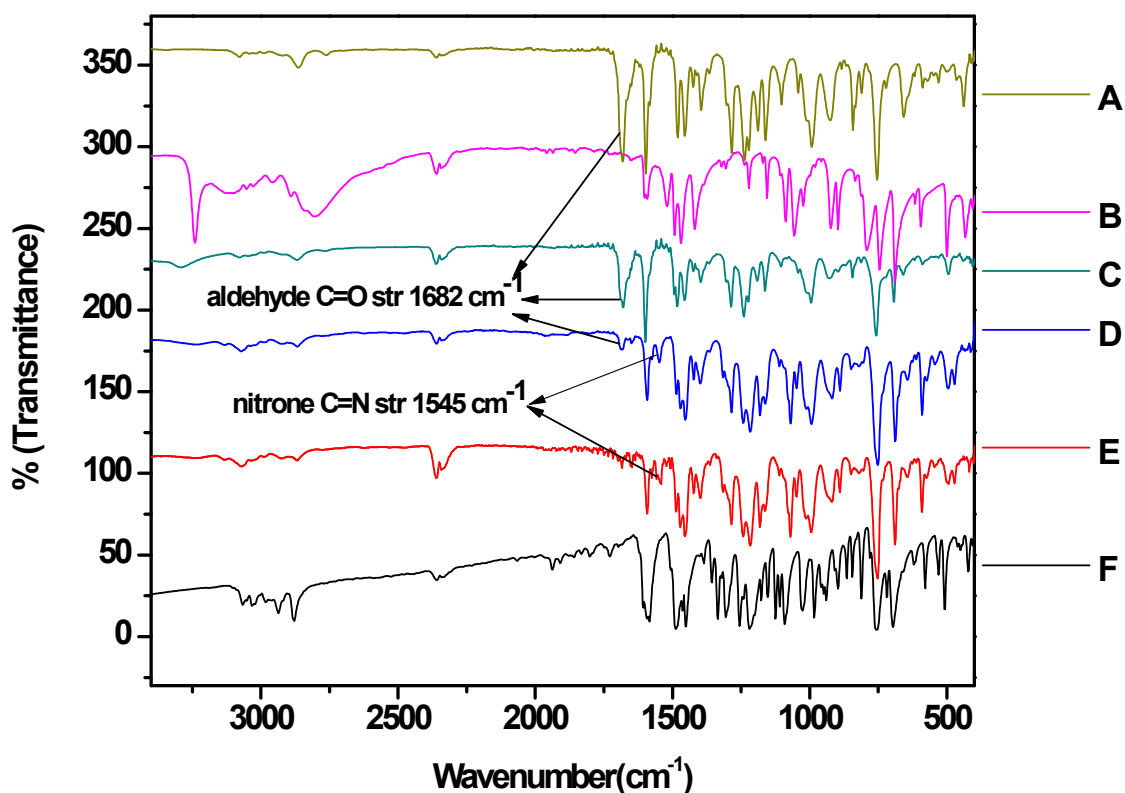

**Fig. S1.** IR studies to monitor the progress of the reaction between 2-(allyloxy)benzaldehyde and phenylhydroxylamine: “A” represents the IR spectra of pure 2-(allyloxy)benzaldehyde, “B” represents the IR spectra of pure phenylhydroxylamine, “C” represents the reaction mixture just after few seconds of mixing, “D” represents the reaction mixture after 5 min of grinding, “E” represent the reaction mixture after 10 min of grinding, “F” represents the reaction mixture after heating at  $60\text{ }^{\circ}\text{C}$  for 90 min; str is abbreviation of stretching.

**Table S2.** Coupling constant values ( $J_{\text{H3a-H9b}}$ ) of ring junction protons of **4**

| Entry | Product ( <b>4</b> ) | $J_{\text{H3a-H9b}}$ |
|-------|----------------------|----------------------|
| 1     | <b>4a</b>            | $J = 7.8$ Hz         |
| 2     | <b>4b</b>            | $J = 6.9$ Hz         |
| 3     | <b>4c</b>            | $J = 5.6$ Hz         |
| 4     | <b>4d</b>            | $J = 7.6$ Hz         |
| 5     | <b>4e</b>            | $J = 7.5$ Hz         |
| 6     | <b>4f</b>            | $J = 6.9$ Hz         |
| 7     | <b>4g</b>            | $J = 5.6$ Hz         |
| 8     | <b>4h</b>            | $J = 7.8$ Hz         |
| 9     | <b>4i</b>            | $J = 6.8$ Hz         |
| 10    | <b>4j</b>            | $J = 7.6$ Hz         |
| 11    | <b>4k</b>            | $J = 6.8$ Hz         |
| 12    | <b>4l</b>            | $J = 4.8$ Hz         |
| 13    | <b>4m</b>            | $J = 7.6$ Hz         |
| 14    | <b>4n</b>            | $J = 7.2$ Hz         |
| 15    | <b>4o</b>            | $J = 8.0$ Hz         |
| 16    | <b>4p</b>            | $J = 7.2$ Hz         |
| 17    | <b>4q</b>            | $J = 8.0$ Hz         |
| 18    | <b>4r</b>            | $J = 7.2$ Hz         |
| 19    | <b>4s</b>            | $J = 5.2$ Hz         |
| 20    | <b>4t</b>            | $J = 7.8$ Hz         |
| 21    | <b>4u</b>            | $J = 7.6$ Hz         |
| 22    | <b>4v</b>            | $J = 6.8$ Hz         |
| 23    | <b>4w</b>            | $J = 5.2$ Hz         |
| 24    | <b>4x</b>            | $J = 7.6$ Hz         |
| 25    | <b>4y</b>            | $J = 6.0$ Hz         |
| 26    | <b>4z</b>            | $J = 7.6$ Hz         |

## References

1. R. Rohlmann, C.-G. Daniliuc and O. García Mancheño, *Chem. Commun.*, **2013**, 49, 11665-11667.

## Selected NMR Spectra

### <sup>1</sup>H-NMR of 4a

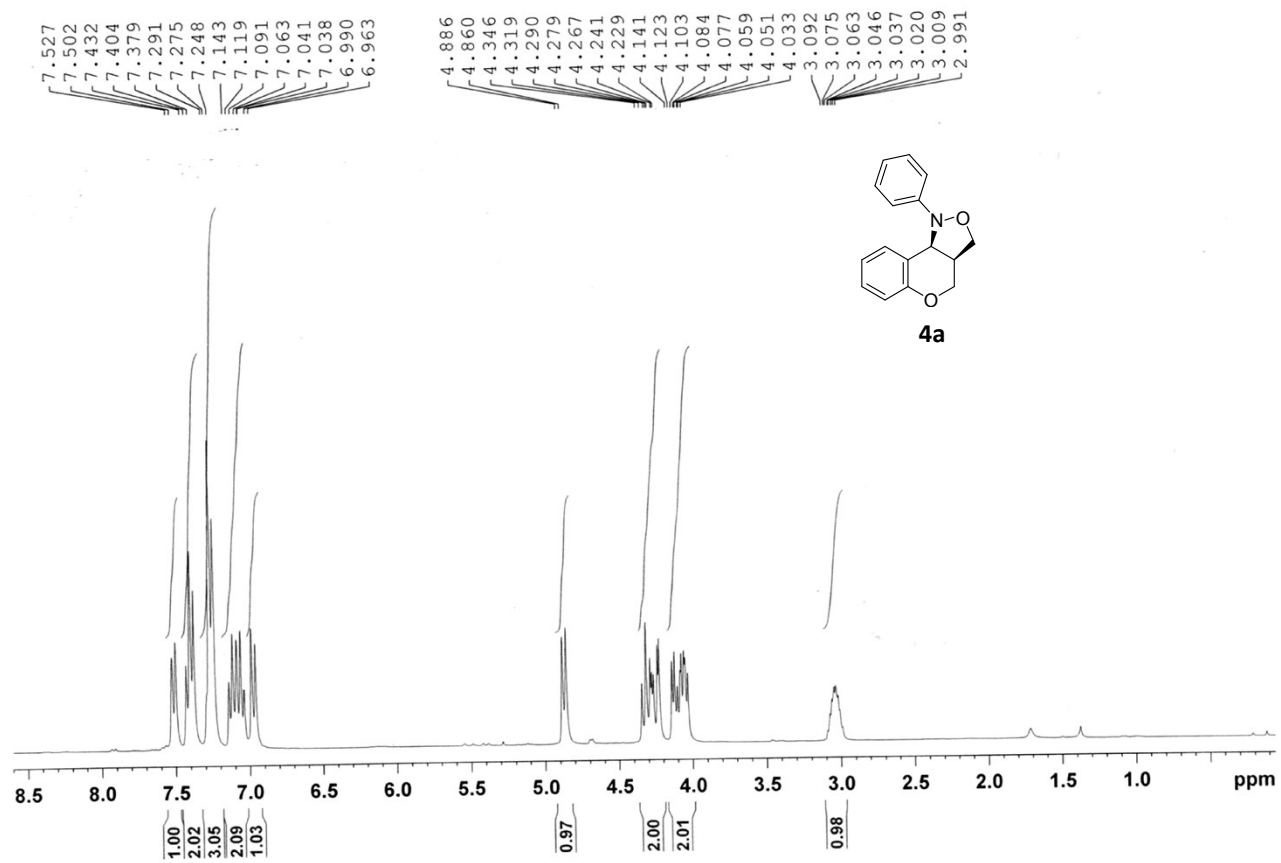

# <sup>13</sup>C-NMR of 4a

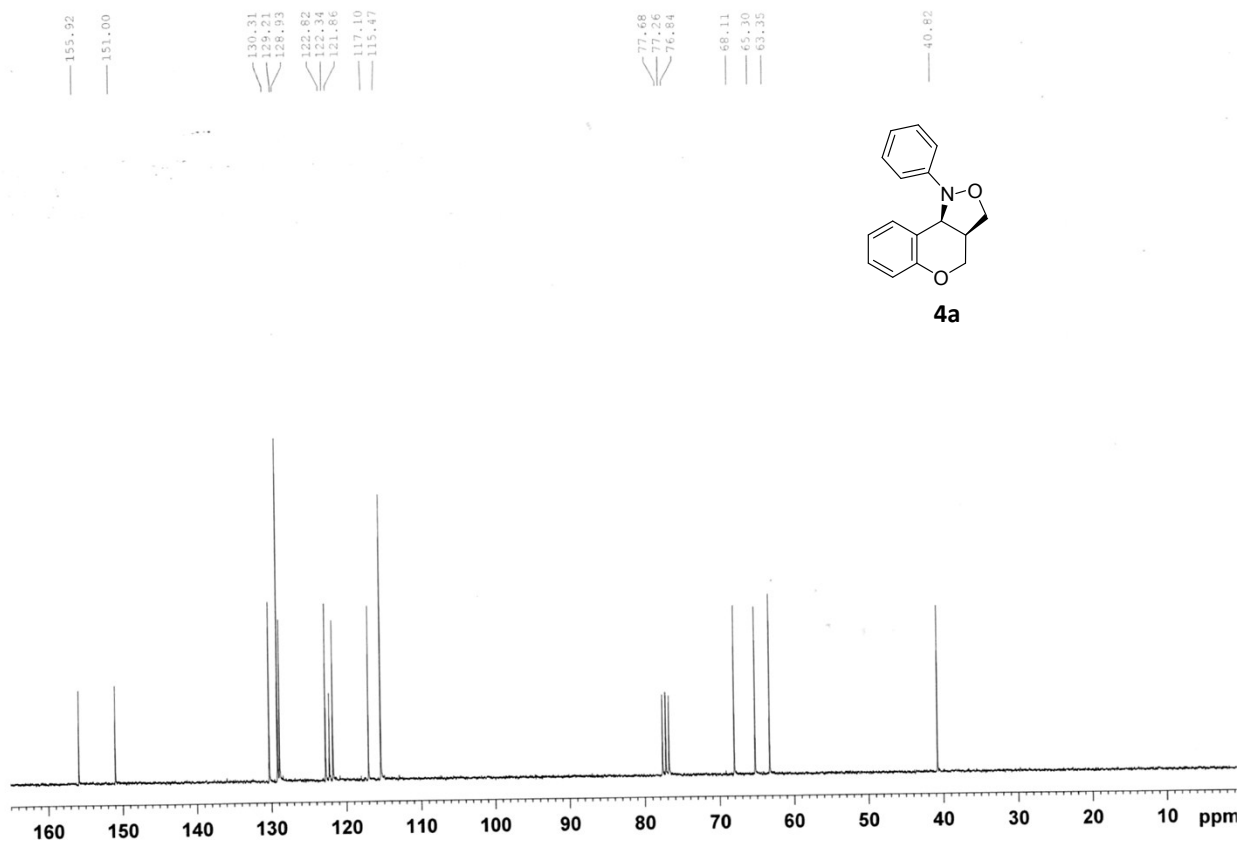

# <sup>1</sup>H-NMR of 4b

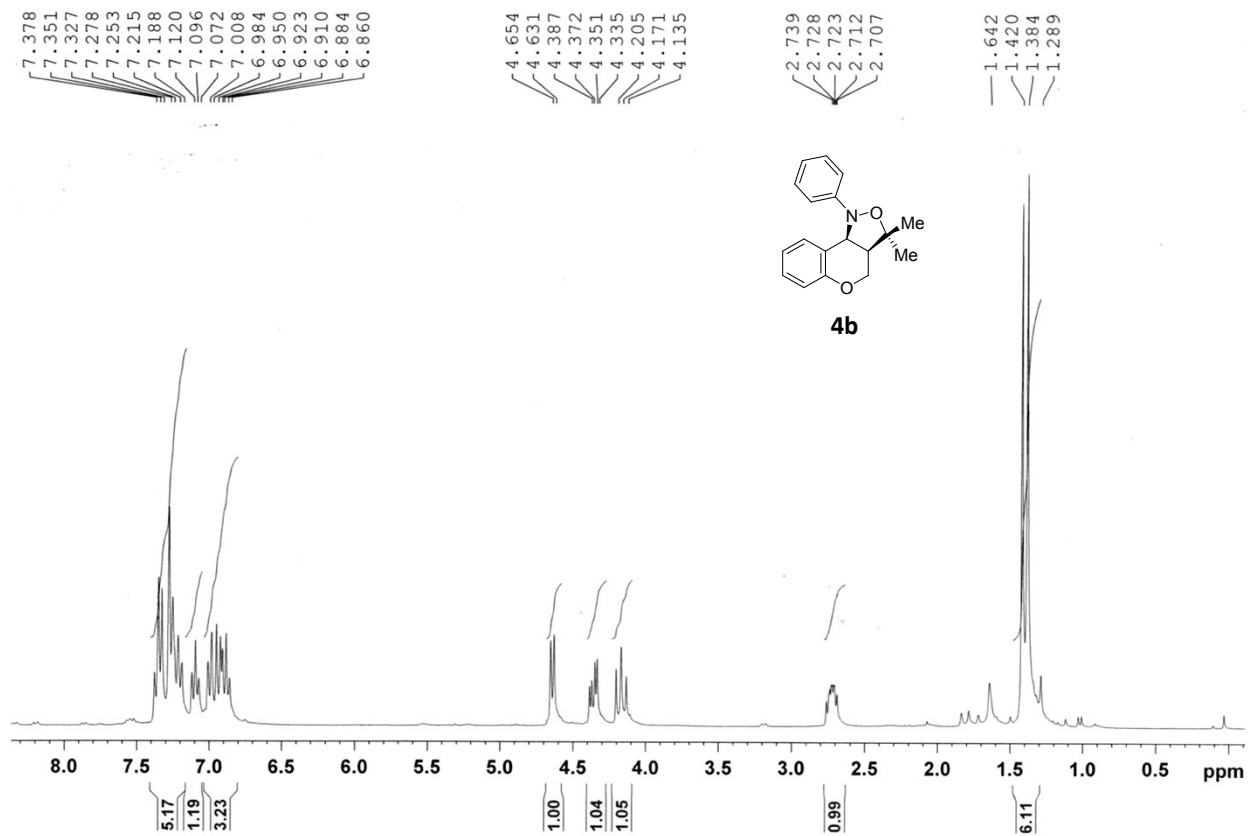

# <sup>13</sup>C-NMR of 4b

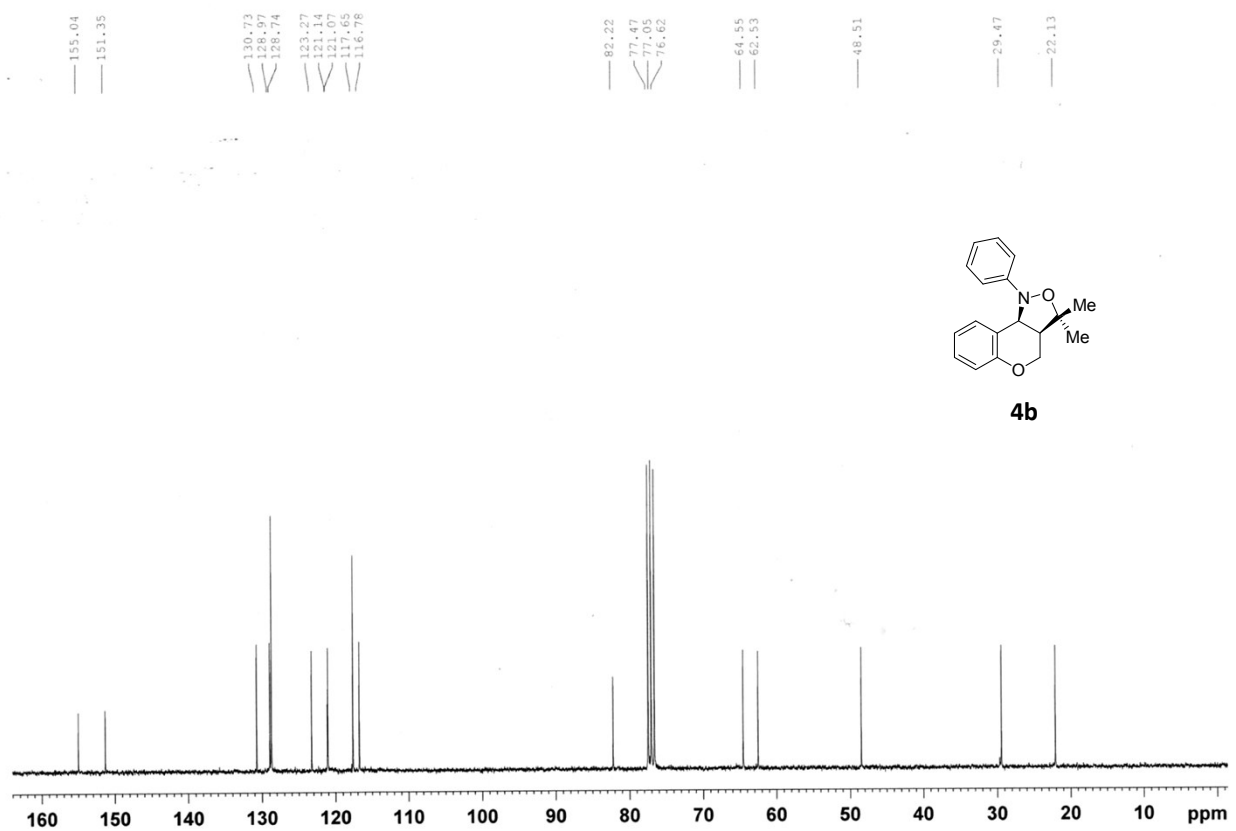

# <sup>1</sup>H-NMR of 4h

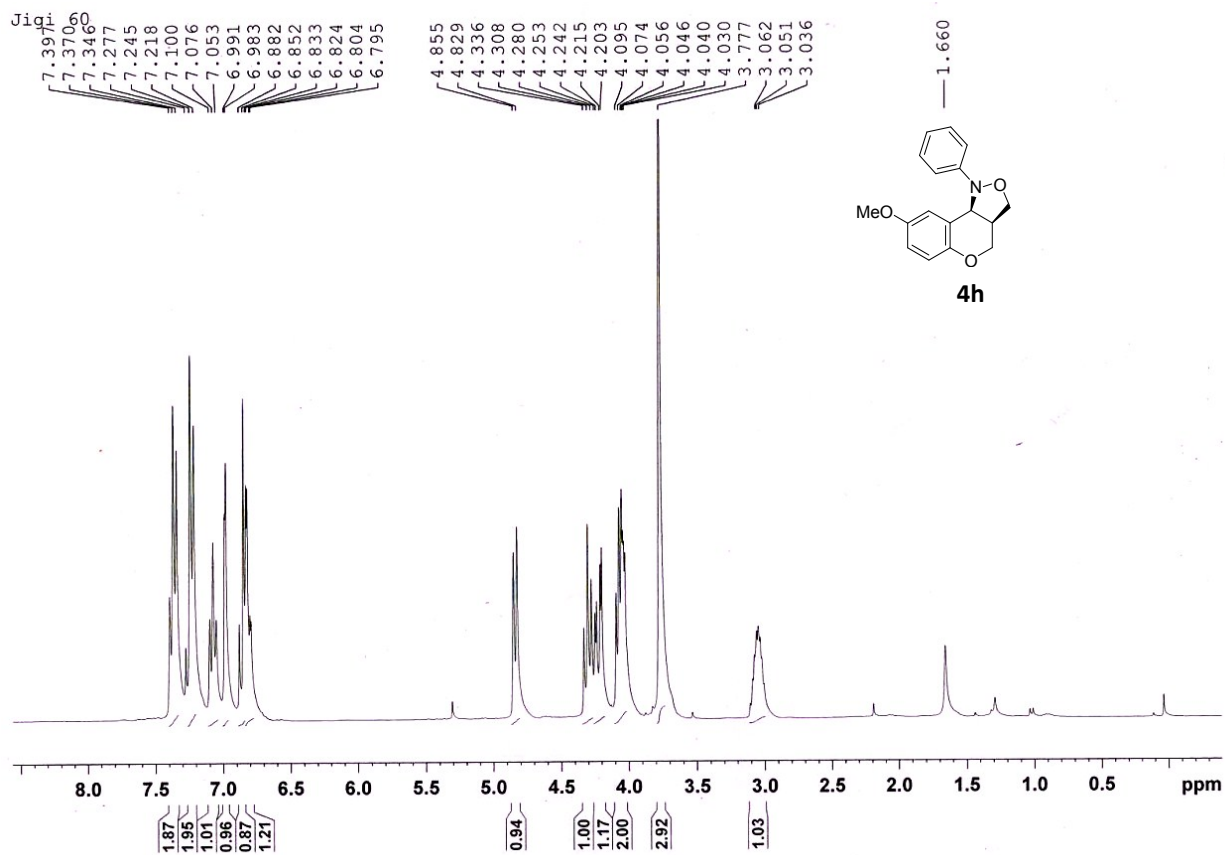

# <sup>13</sup>C-NMR of 4h

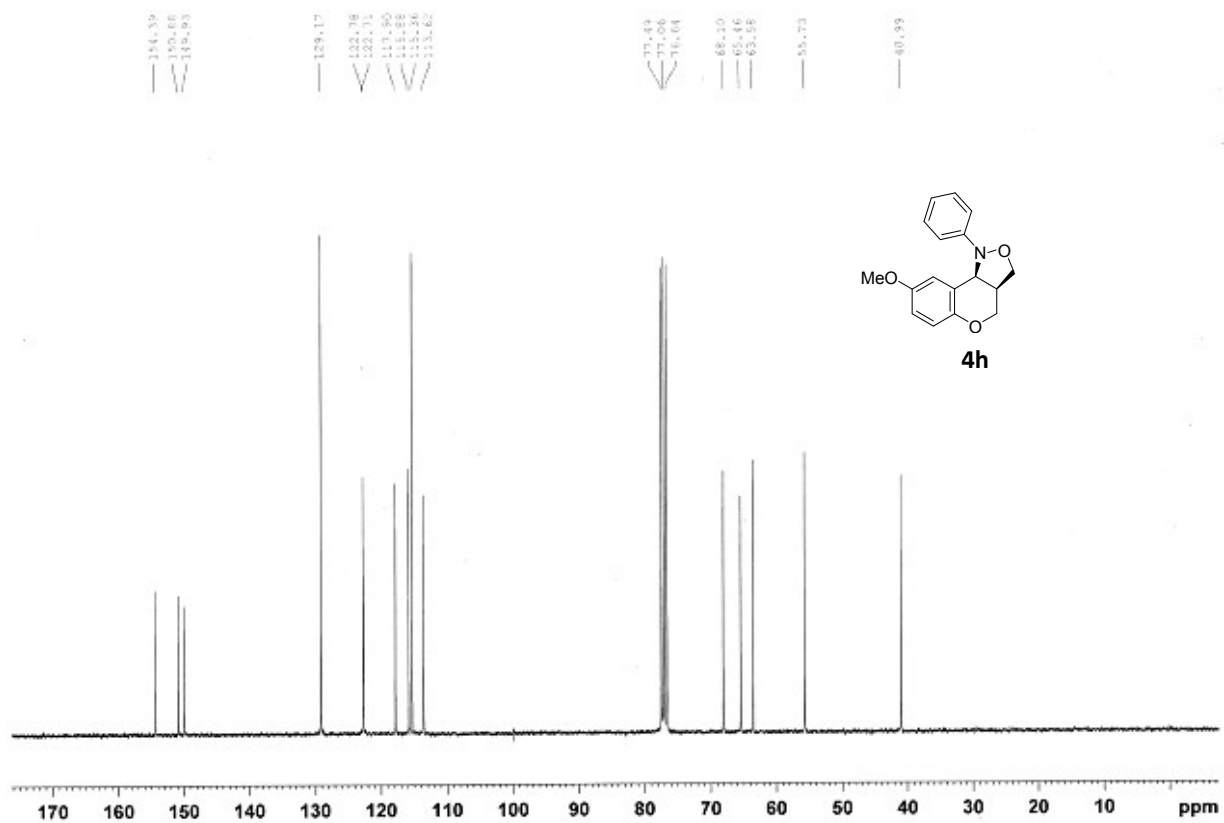



# <sup>1</sup>H-NMR of 4i

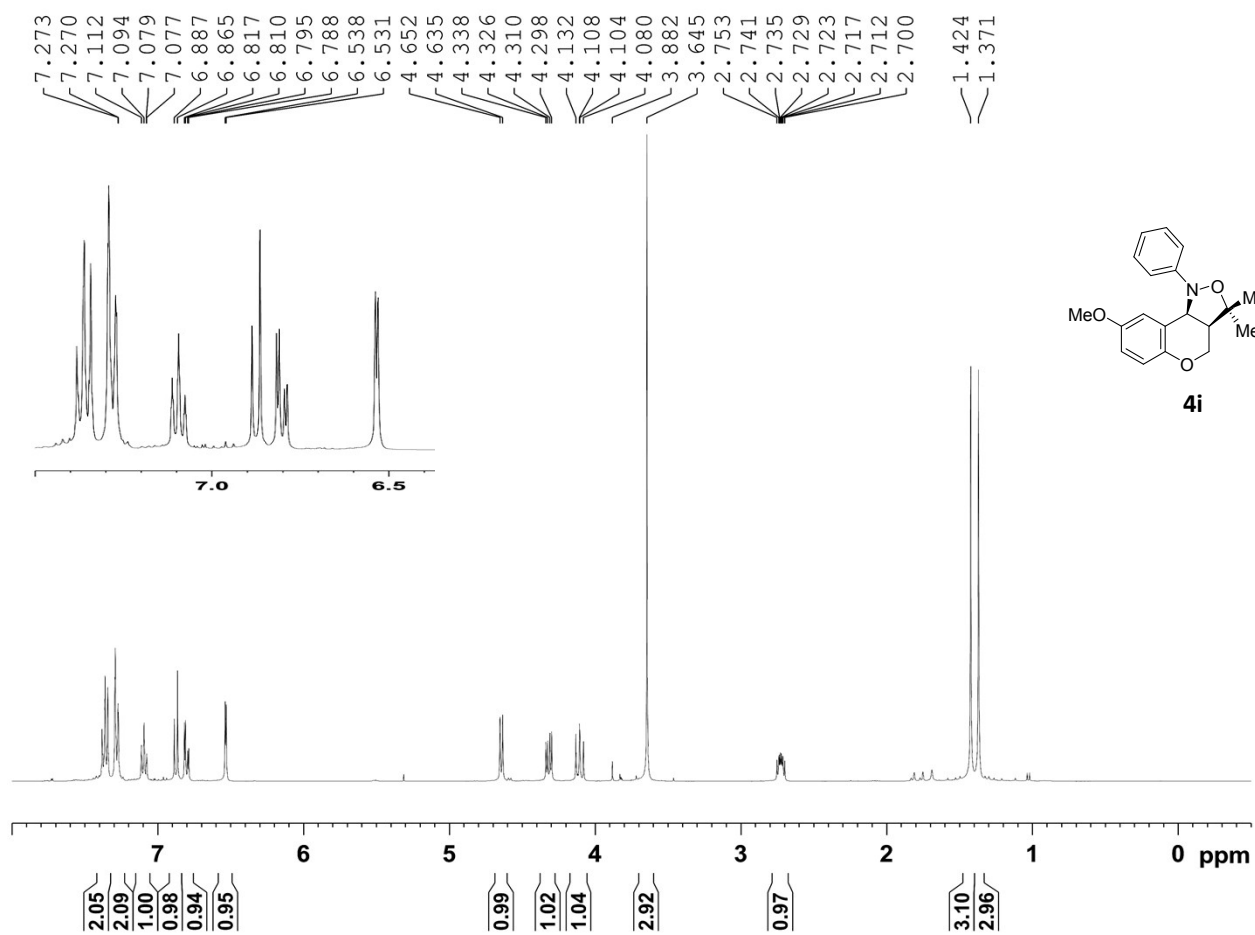

# <sup>13</sup>C-NMR of 4i

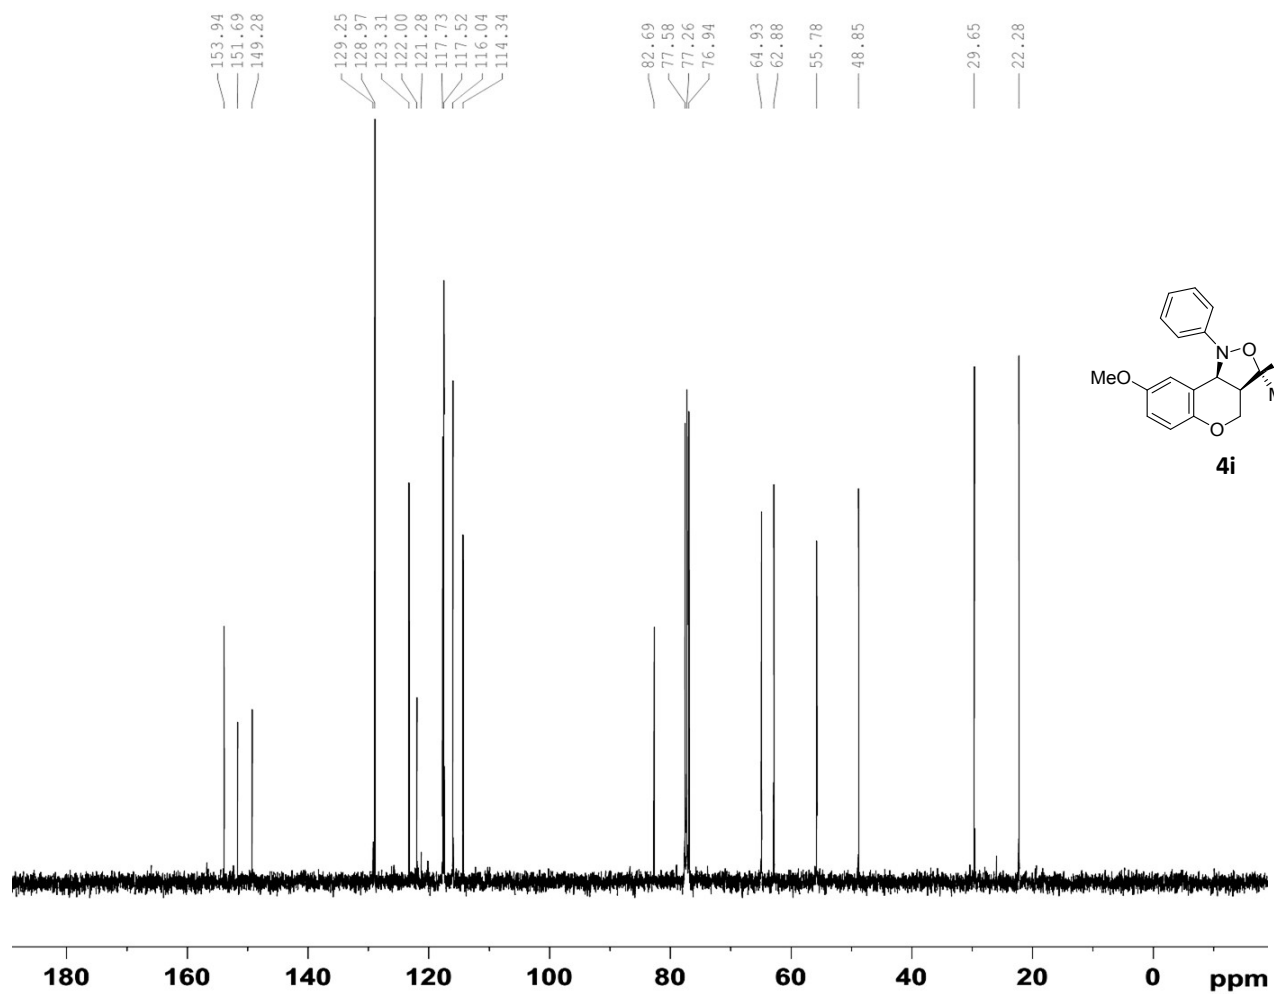

# <sup>1</sup>H-NMR of 4l

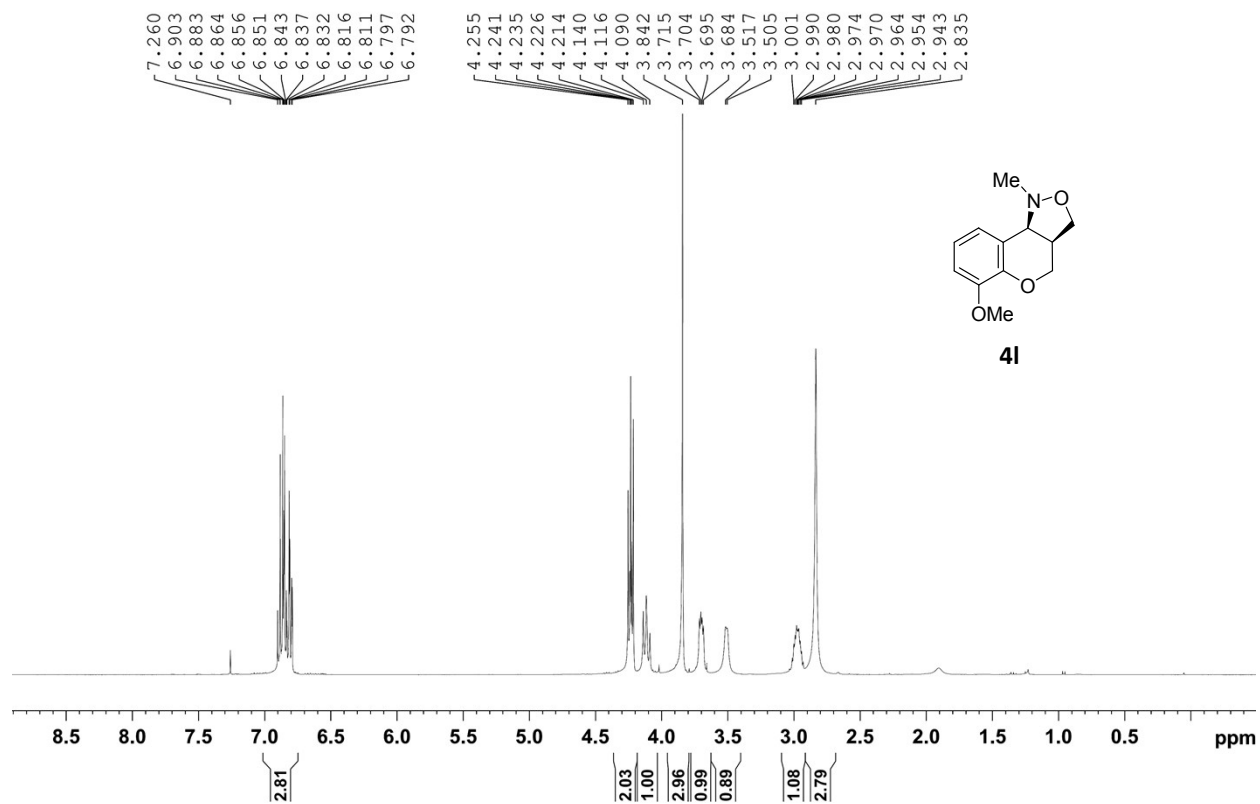

# <sup>13</sup>C-NMR of 4l

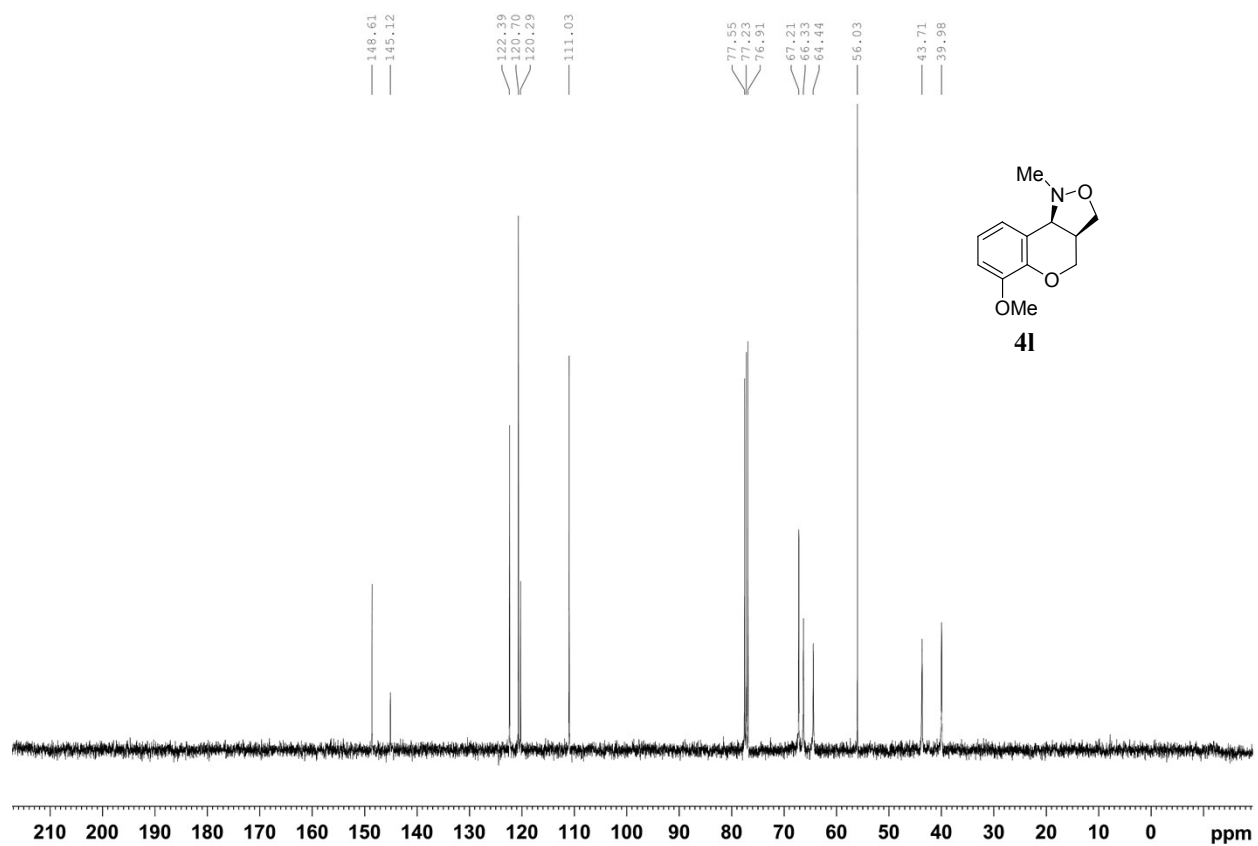

# <sup>1</sup>H-NMR of 4m

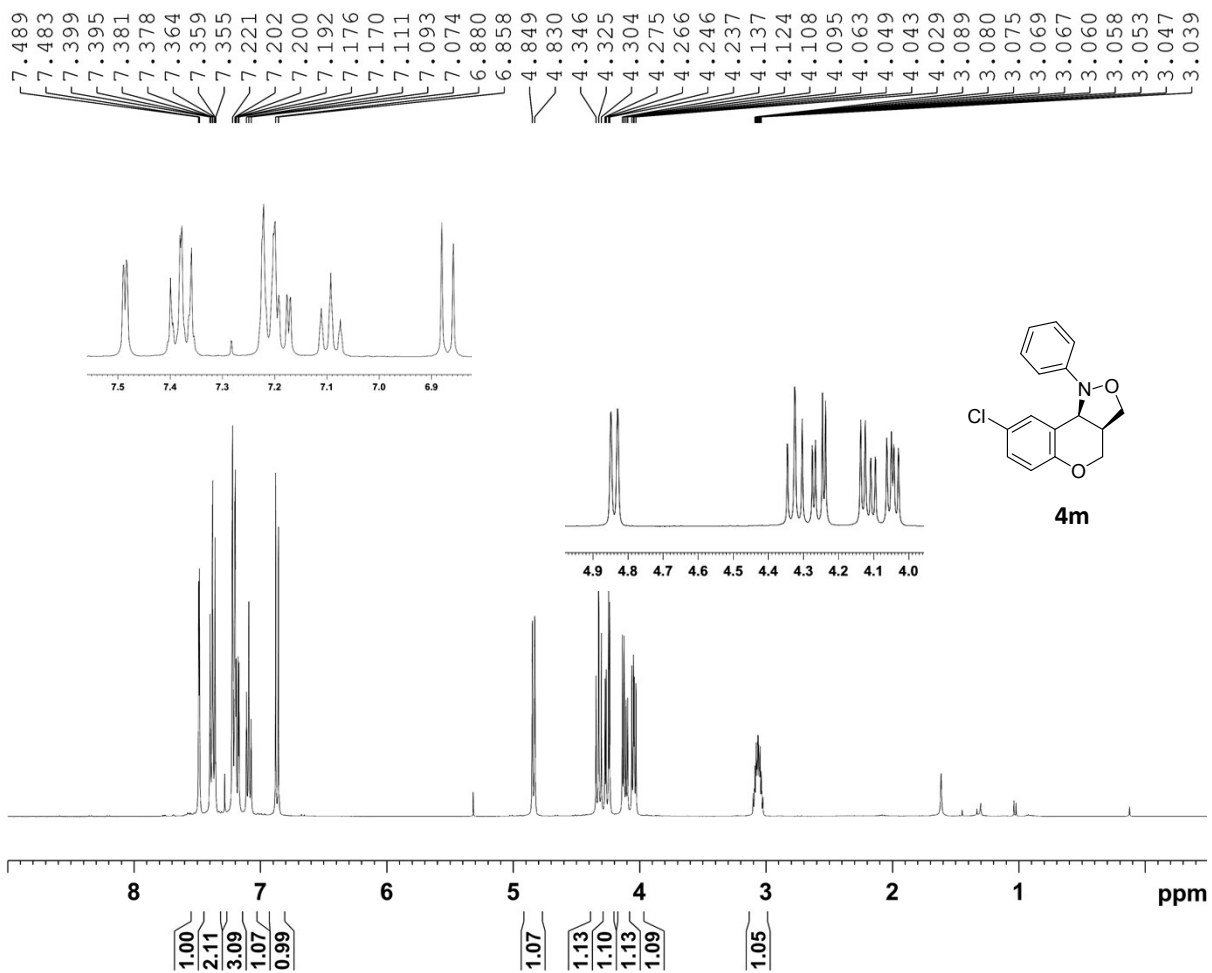

# <sup>13</sup>C-NMR of 4m

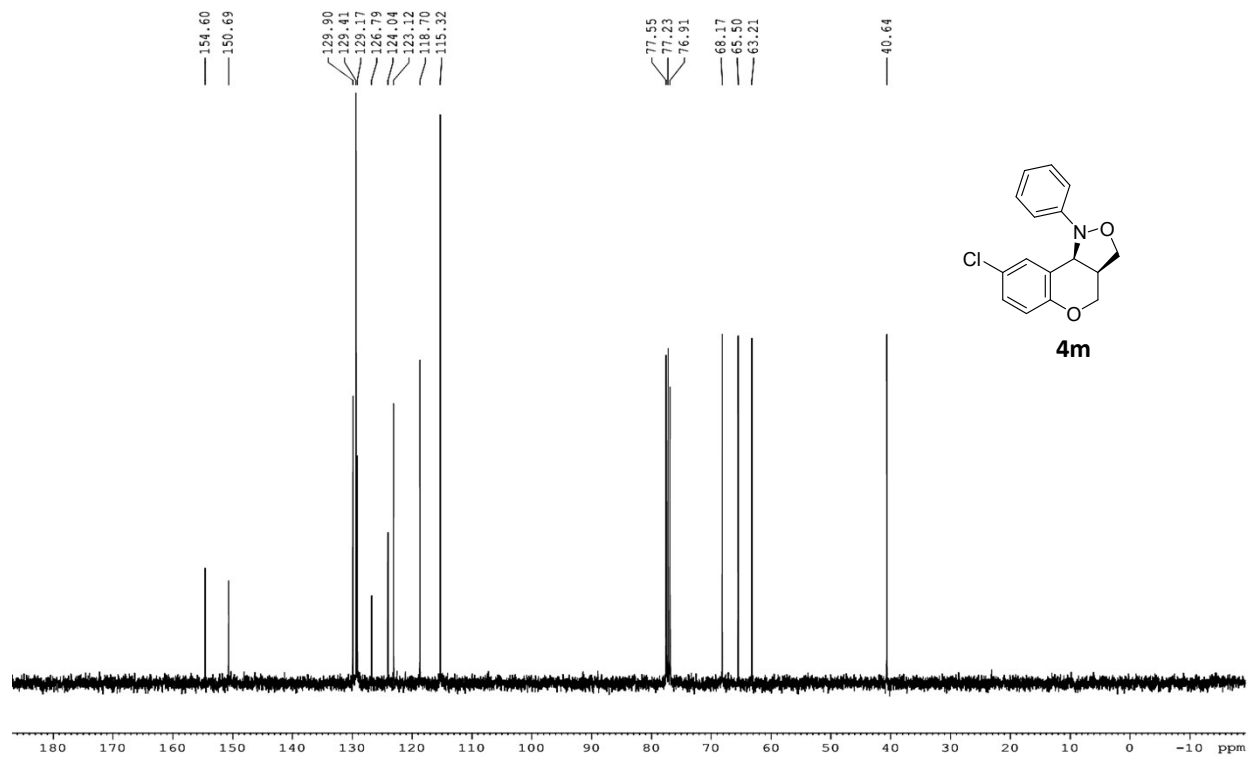

# <sup>1</sup>H-NMR of 4o

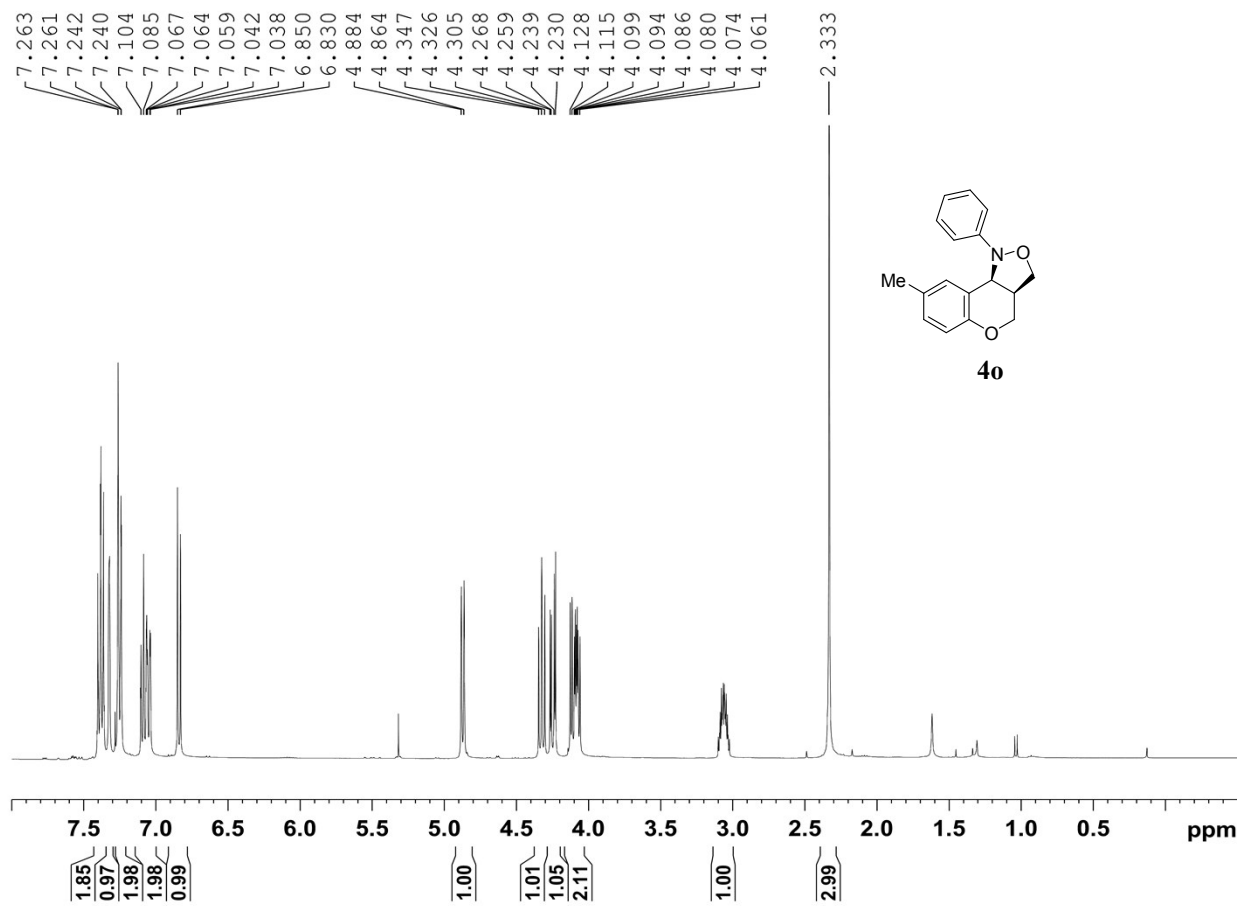

# <sup>13</sup>C-NMR of 4o

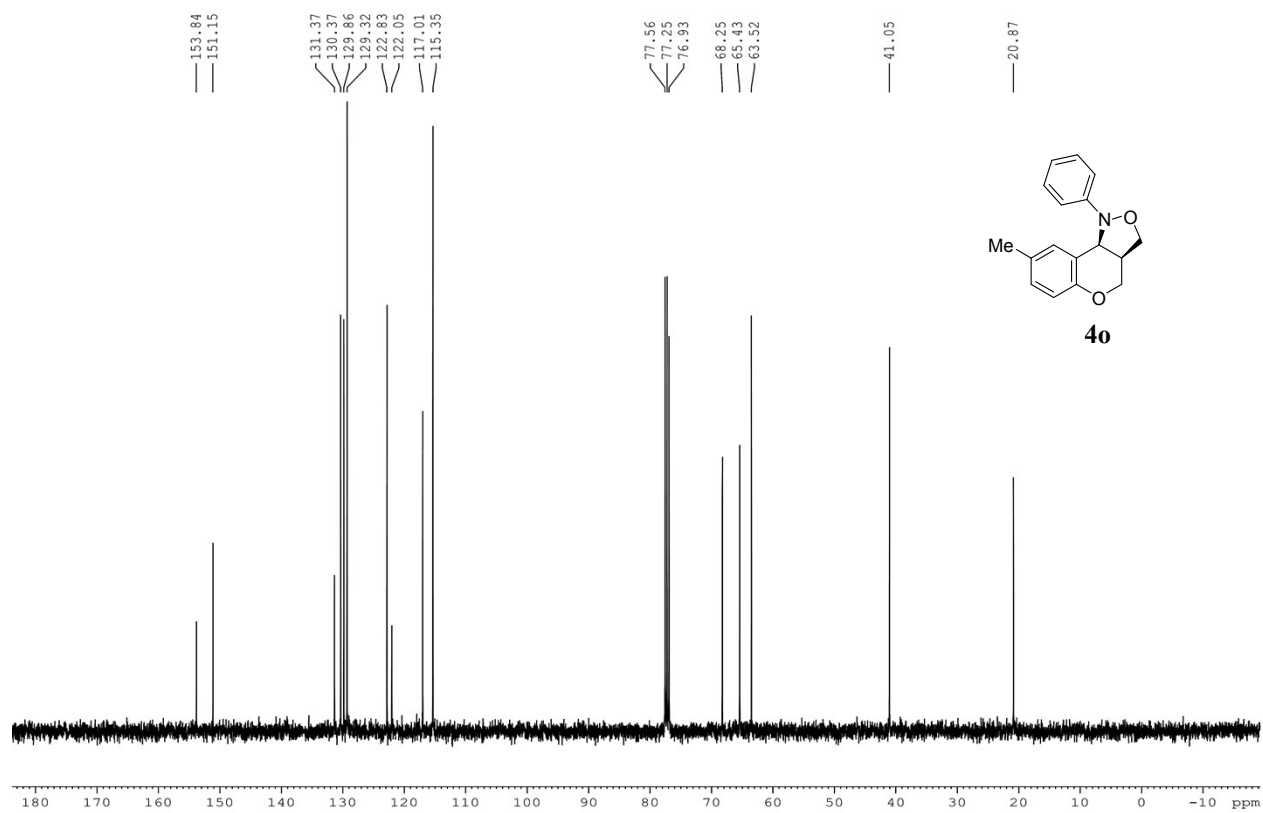



# <sup>1</sup>H-NMR of 4v

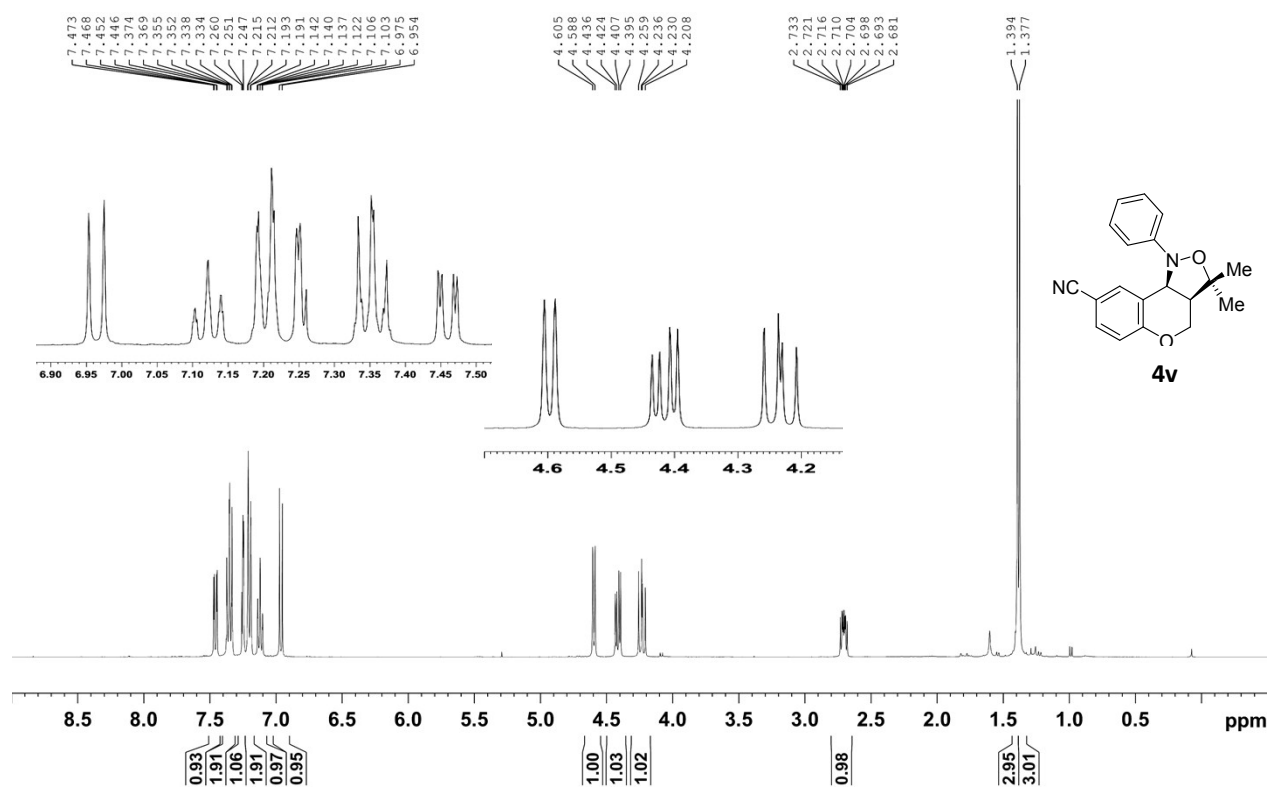

# <sup>13</sup>C-NMR of 4v

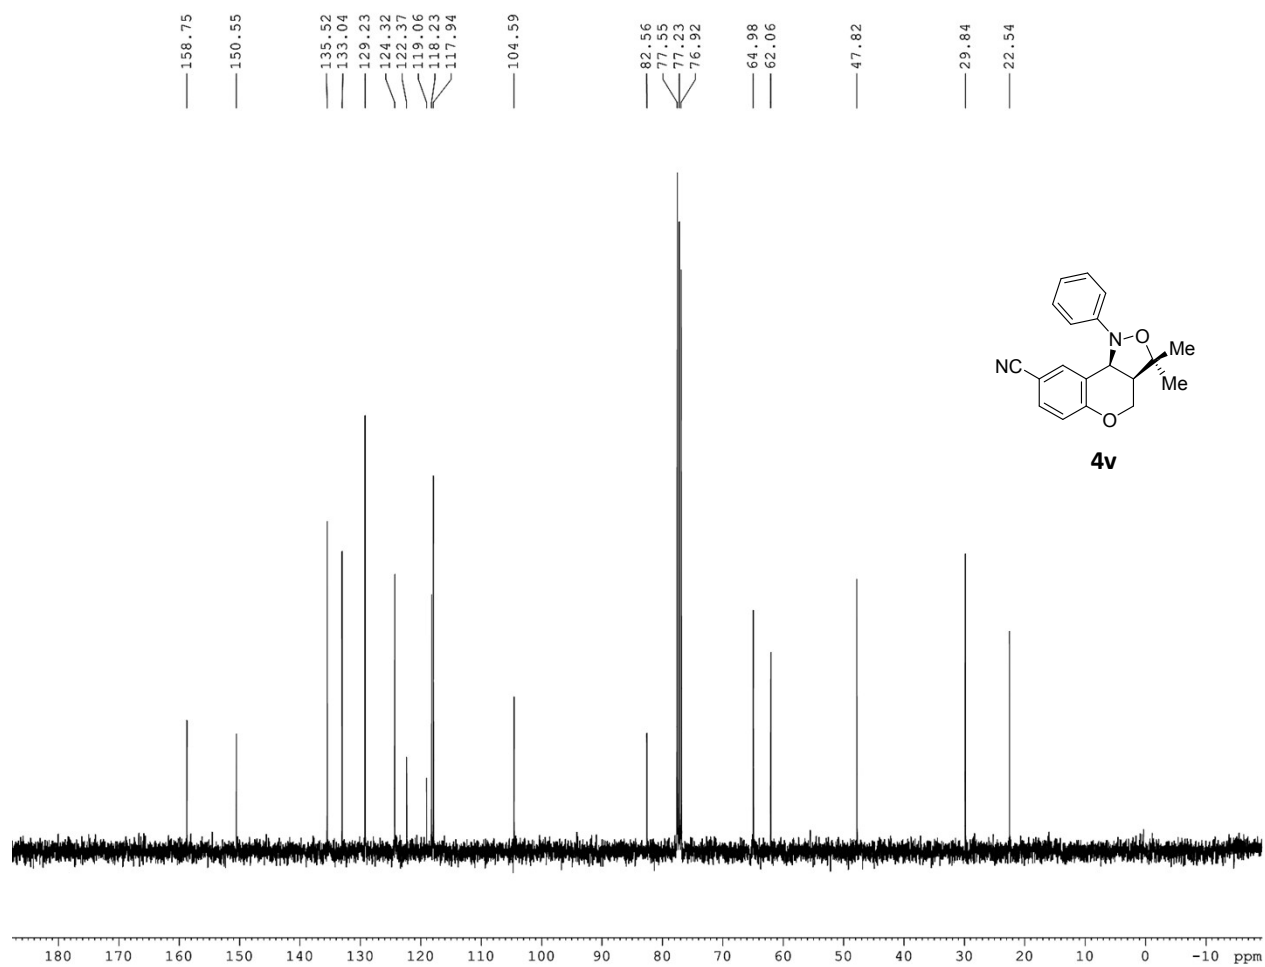

# <sup>1</sup>H-NMR of 4y

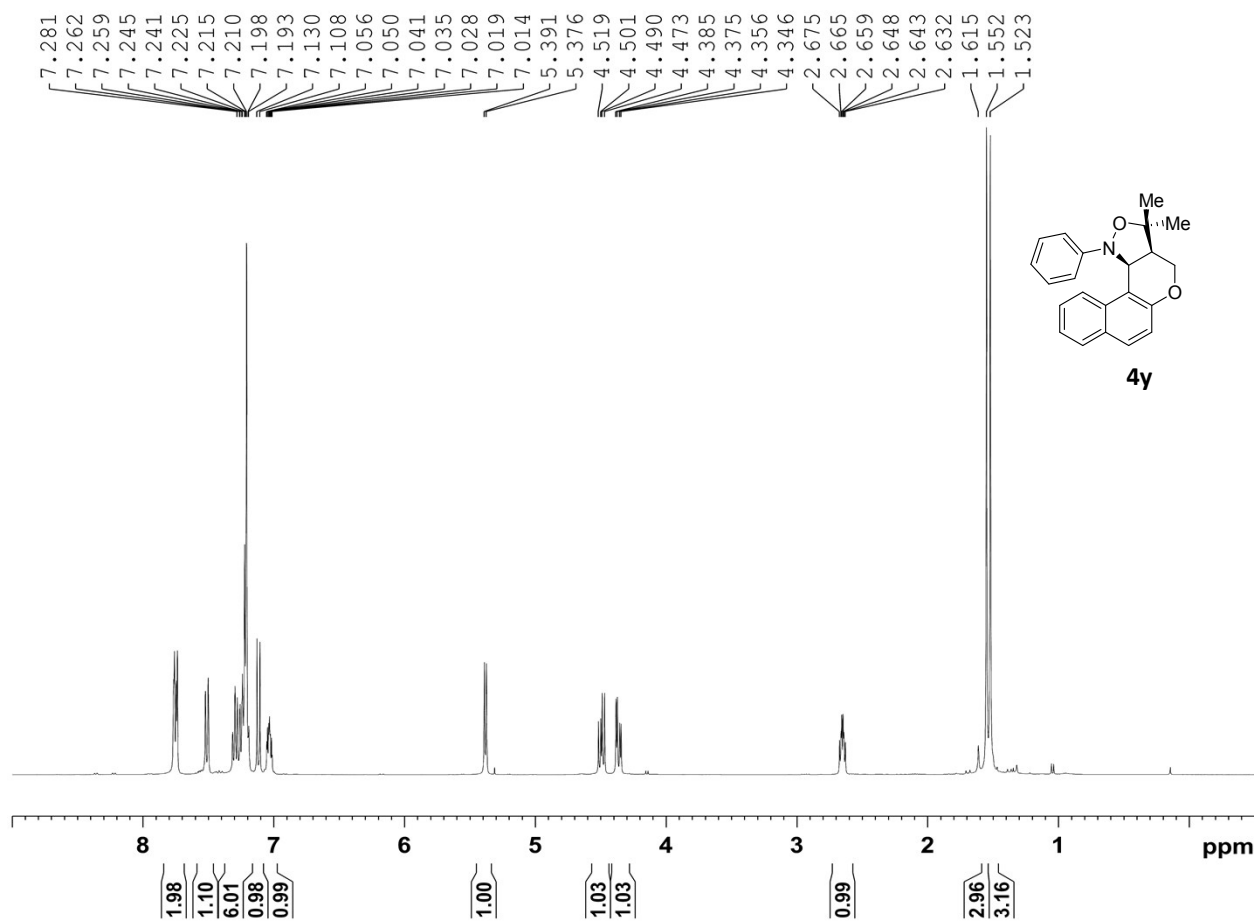

# <sup>13</sup>C-NMR of 4y

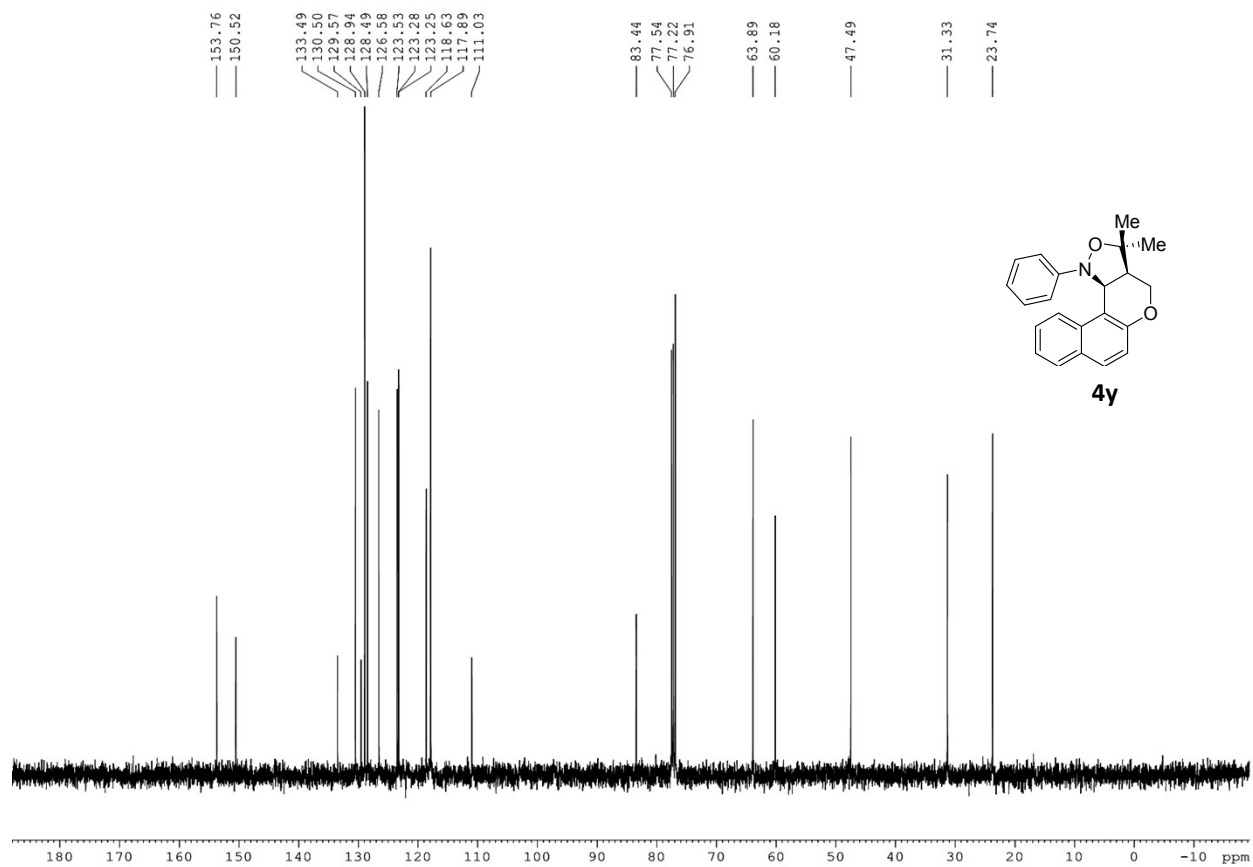

Supplement: c5ra21044e1.pdf [file c5ra21044e1.pdf]
